# Supplementary material for: Regulators of coastal wetland methane production and responses tosimulated global change
Source: Copernicus journal article supplement (doi:10.5194/bg-2016-314), 2016-08-15

# Regulators of coastal wetland methane production and responses to simulated global change

Carmella Vizza<sup>1</sup>, William E. West<sup>1,2</sup>, Stuart E. Jones<sup>1</sup>, Julia A. Hart<sup>1,3</sup>, and Gary A. Lamberti<sup>1</sup>

5 <sup>1</sup>Department of Biological Sciences, University of Notre Dame, Notre Dame, 46556, USA

<sup>2</sup>Kellogg Biological Station, Michigan State University, Hickory Corners, 49060, USA

<sup>3</sup>Center for Limnology, University of Wisconsin, Madison, 53706, USA

*Correspondence to:* Carmella Vizza ([cvizza@nd.edu](mailto:cvizza@nd.edu))

**Abstract.** Wetlands are the largest natural source of methane (CH<sub>4</sub>) to the atmosphere, but their emissions vary along salinity and productivity gradients. Global change has the potential to reshape these gradients and therefore alter future contributions of wetlands to the global CH<sub>4</sub> budget. Our study examined CH<sub>4</sub> production along a natural salinity gradient in fully inundated coastal Alaska wetlands. In the laboratory, we incubated natural sediments to compare CH<sub>4</sub> production rates between non-tidal freshwater and tidal brackish wetlands, and quantified the abundances of methanogens and sulfate-reducing bacteria in these ecosystems. We also simulated the short-term biogeochemical effects of sea-level rise and enhanced organic matter availability, which we predicted would have contrasting effects on coastal wetland CH<sub>4</sub> production. Tidal brackish wetlands produced less CH<sub>4</sub> than non-tidal freshwater wetlands probably due to high sulfate availability and generally higher abundances of sulfate-reducing bacteria, whereas non-tidal freshwater wetlands had significantly greater methanogen abundances. Simulating the biogeochemical effects of sea-level rise in freshwater sediments, however, did not reduce CH<sub>4</sub> production, perhaps because the 14-day incubation period was too short to elicit a shift in microbial communities. In contrast, increased organic matter enhanced CH<sub>4</sub> production in 75% of the incubations, but this response depended on the macrophyte species, added with half of the species treatments having no significant effect. Our study suggests that CH<sub>4</sub> production in coastal wetlands, and therefore their overall contribution to the global CH<sub>4</sub> cycle, will be sensitive to increased organic matter availability and potentially sea-level rise. To better predict future wetland contributions to the global CH<sub>4</sub> budget, future studies and modeling efforts should investigate how multiple global change mechanisms will interact to impact CH<sub>4</sub> dynamics.

**Keywords:** Methanogenesis, seawater intrusion, saltwater incursion, redox conditions, microbial communities

## 1 Introduction

Wetlands contribute about 60% of all natural methane (CH<sub>4</sub>) emissions to the atmosphere (Kirschke et al., 2013). As global temperatures continue to increase, some models predict that wetland CH<sub>4</sub> emissions will double by 2100 (Gedney et al., 2004).

Because CH<sub>4</sub> is a potent greenhouse gas whose radiative forcing continues even after its oxidation to CO<sub>2</sub> (Neubauer and Megonigal 2015), higher wetland emissions could trigger a positive feedback loop that further increases temperatures and CH<sub>4</sub> release. Currently, wetlands at northern latitudes are thought to be on the brink of the “greenhouse compensation point,” wherein carbon sequestration is offset by greenhouse gas emissions (Whiting and Chanton, 2001), but this balance between sequestration and emissions is highly dependent on the temporal perspective being considered (e.g., Froelking and Roulet 2007).

Nevertheless, higher future CO<sub>2</sub> levels, which could result in further warming, an extended growing season, and CO<sub>2</sub> fertilization, could upset this present balance by converting northern wetlands to net sources of carbon to the atmosphere in the short-term, especially if the resulting increases in plant productivity provide additional organic matter to fuel additional CH<sub>4</sub> production (Ringeval et al., 2011). Predicting the response of these ecosystems to global change is challenging because we do not fully understand the sensitivity of the CH<sub>4</sub> cycle to enhanced productivity of wetland plants (McGuire et al., 2009; Ringeval et al., 2011).

Warming associated with increasing CO<sub>2</sub> levels will also lead to sea-level rise in coastal areas and longer growing seasons at northern latitudes (Walther et al., 2002), thus further enhancing the CO<sub>2</sub> fertilization effect (Matthews, 2007; Ringeval et al., 2011), all of which could affect where wetlands stand in relation to their current greenhouse compensation point. These elements of global change could indirectly alter two of the main factors that influence CH<sub>4</sub> production – substrate availability and redox conditions (Whalen, 2005). Methanogens generally use substrates provided by the fermentation of organic matter, producing CH<sub>4</sub> via two pathways: (1) acetoclastic methanogenesis, where acetate is the substrate of choice, and (2) hydrogenotrophic methanogenesis, where H<sub>2</sub> and CO<sub>2</sub> are the substrates utilized (Conrad, 1999). Acetate is therefore an important substrate that methanogens either directly use (acetoclastic pathway) or indirectly use via the H<sub>2</sub> and CO<sub>2</sub> resulting from its fermentation and that of other organic matter (hydrogenotrophic pathway). However, methanogens can be outcompeted for these substrates because carbon is not an energetically favorable electron acceptor in comparison to those used by other microbes. High redox potential and the presence of alternative electron acceptors (e.g., NO<sub>3</sub><sup>-</sup>, SO<sub>4</sub><sup>2-</sup>) can signal intense microbial competition for the fermentative substrates that methanogens utilize (Lovley and Klug, 1983; 1986; Lovley and Phillips, 1987). For example, Winfrey and Ward (1983) observed much greater rates of sulfate reduction than CH<sub>4</sub> production in intertidal sediments until sulfate became depleted. However, an abundant supply of organic matter can increase substrate availability, act as an electron donor, and lower redox potential as alternate electron acceptors are consumed (Achtlich et al., 1995). Both redox conditions and substrate availability will therefore play an important role in determining the effects of global change on CH<sub>4</sub> production.

To accurately forecast the future global CH<sub>4</sub> budget, it is critical that we understand the effects of sea-level rise and increased organic matter availability on CH<sub>4</sub> production in wetlands (Fig. 1), which [may be influenced by](#) rising global CO<sub>2</sub> concentrations and temperatures. Laboratory studies and field surveys report increased CH<sub>4</sub> production and emissions with warming (Moore and Dalva, 1993; Klinger et al., 1994; Lofton et al., 2014). [Additionally, elevated CO<sub>2</sub> levels can also lead to higher photosynthesis and CH<sub>4</sub> emission rates \(Megonigal and Schlesinger 1997; Vann and Megonigal 2003\).](#) However, despite their potential importance in regulating CH<sub>4</sub> emissions from wetlands, especially those at northern latitudes, few studies have attempted to simulate the effects of sea-level rise or increased substrate availability on CH<sub>4</sub> production. Both of these global change mechanisms are likely to disrupt coastal wetland biogeochemical cycles, especially at northern latitudes where their effects are likely to be stronger and more abrupt.

We studied wetland ecosystems in the Copper River Delta of Alaska, an area vulnerable to global change because of its northern location and proximity to the ocean. Over the past 50 years, average annual temperatures in Alaska have increased 1.9 °C, with winter temperatures rising 3.6 °C (U.S. Global Climate Change Program, 2009), which is extending the growing season. In addition, the projected global sea-level rise of 100 cm by 2100 (Vermeer and Rahmstorf, 2009) will be exacerbated along the southcentral Alaskan coast where tectonic subsidence is prominent (Freymueller et al., 2008). For example, the Copper River Delta, which is subsiding at about [0.85 cm](#) per year (Freymueller et al., 2008), is at risk of a relative sea-level rise of about [170 cm](#) by 2100.

Our study objectives were to (1) compare CH<sub>4</sub> production rates and microbial community abundances in sediments from [constantly inundated](#) non-tidal freshwater and tidal brackish wetlands in the Copper River Delta, (2) simulate the [short-term biogeochemical effects of sea-level rise](#) for freshwater wetlands, and (3) simulate increased organic matter availability in freshwater wetlands. We hypothesized that (1) tidal brackish wetlands sediments will have lower CH<sub>4</sub> production rates than those from the non-tidal freshwater wetlands, (2) tidal brackish wetland sediments will have higher abundance of sulfate-reducing bacteria, but lower numbers of methanogens than non-tidal freshwater wetlands, (3) simulating [the biogeochemical effects of sea-level rise](#) in freshwater sediments will decrease CH<sub>4</sub> production rates, with sulfate availability largely being responsible for this effect, and (4) increasing the amount of organic matter available will enhance CH<sub>4</sub> production, but substrate quality will moderate this effect. Our conceptual model for these interactions is depicted in Fig. 1.

## 2 Materials and Methods

### 2.1 Study area

The Copper River in southcentral Alaska is the eighth largest river in the United States (U.S. Geological Survey, 1990). Draining a large region of the Chugach Mountains and the Wrangell Mountains into the Gulf of Alaska, the Copper River and

its sediment deposits have shaped the largest contiguous wetland on the Pacific Coast of North America. The Copper River Delta (CRD) encompasses about 283,000 hectares of wetland habitat and supports extraordinary biodiversity (Bryant, 1991) in a largely pristine landscape. Wetlands and shallow ponds (0.2 to 2 m in depth) were created and modified by the Great Alaska earthquake in 1964 that elevated the CRD by 1–4 m depending on location (Thilenius, 1995). A natural succession of wetlands thereby emerges from the ocean to the uplands (Fig. 2). Our study focused on the brackish tidal wetlands and non-tidal freshwater wetland/pond habitats. The brackish tidal wetlands we chose to study were increasingly brackish during rising high tide but were fully inundated with freshwater during low tide so as to be comparable to the fully inundated non-tidal freshwater wetlands. The freshwater wetland habitats currently receive little to no tidal influence, but their surrounding sloughs and rivers are tidally influenced, which could result in future seawater intrusion with sea-level rise. We consider the freshwater wetlands to be “pond-like” because they have clearly delineated boundaries, whereas the brackish wetlands are more continuous in nature. We chose these two ecosystem types because they are the most prevalent yet distinctive habitats on the CRD with which to contrast CH<sub>4</sub> production.

## 2.2 Experimental design

### 2.2.1 Sample collection

Using a handheld bucket auger, sediment samples (~ 250 mL) were collected from nine non-tidal freshwater wetlands and five tidal brackish wetland sites varying in physicochemical parameters (Table 1); tidal brackish wetland sites were combined when presenting summary data due to their continuous nature in contrast to the freshwater wetlands, which had distinct boundaries. Due to extensive habitat heterogeneity within the non-tidal freshwater wetlands (i.e., open water and several different macrophyte zones), we collected at least five sediment samples representative of the different habitats at each wetland (n = 9) along with at least 1 L of hypolimnetic water during each sampling period, so that the average CH<sub>4</sub> production rates from each system could be accurately assessed. In contrast, the tidal brackish wetland sites generally exhibited less habitat heterogeneity than the non-tidal freshwater wetlands (i.e., we observed only sites dominated by *Carex* spp.), but we observed temporal fluctuations in salinity with a YSI Pro Plus multiparameter water quality meter indicative of tidal influence. We, therefore, collected 1 L of water and one sediment sample at five different sites along a salinity gradient.

### 2.2.2 Non-tidal freshwater and tidal brackish wetland comparison

To assess CH<sub>4</sub> production, laboratory incubations were conducted using sediment and water samples collected during two sampling periods (June and August 2014). Specifically, we conducted five incubations for each non-tidal freshwater wetland (n = 9) and five incubations for tidal brackish wetlands (n = 5 separate locations in the continuous tidal zone). We then we used the average CH<sub>4</sub> production rates from each non-tidal freshwater wetland as a replicate in comparing CH<sub>4</sub> production rates between non-tidal freshwater (n = 9) and tidal brackish (n = 5) systems at each sampling period.

### 2.2.3 Sea-level rise simulation

To assess the effects of sea-level rise on CH<sub>4</sub> production, additional sediments were collected in June from a single site in five of the freshwater wetlands (n = 5) and then incubated with tidal brackish water (6.3 mM sulfate). We then compared them to the average CH<sub>4</sub> production rates of the five sediment samples incubated with freshwater from that same subset of non-tidal freshwater wetlands (n = 5) during June 2014.

### 2.2.4 Increased organic matter simulation

To assess the effects of increased organic matter on CH<sub>4</sub> production, four sediment samples from different sites were used from five of the non-tidal freshwater wetlands (n = 20). An aliquot of each sediment sample from each wetland was incubated with fresh macrophyte tissue from one of four species (treatment) and then compared to an aliquot that served as a paired control sediment sample (total pairs = 20; 5 wetlands x 4 treatments). This paired design controlled for “within wetland” sediment heterogeneity to better capture the response of the methanogens to adding organic matter, or ΔCH<sub>4</sub> production (treatment–control). Our four organic matter treatments were based upon the four dominant aquatic macrophyte species on the CRD – buckbean (*Menyanthes trifoliata*), horsetail (*Equisetum variegatum*), lily (*Nuphar polysepalum*), and marestalk (*Hippuris vulgaris*). Specifically, we cut aboveground tissue to a standard size per species such that 3.0 g of live biomass could be added to each incubation resulting in approximately 0.23 ± 0.02 mmol C per gram of dry sediment (mean ± sd). In most incubations this addition of organic matter increased the total amount of carbon already available in the sediment by 45 ± 15% (Table 2). Differences in substrate quality between these treatments, as described by % C, % N, and % P as well as C:N and C:P, are available from Tiegs et al. (2013). All vegetation for each species was collected from the same plant individual to ensure minimal difference in quality within each treatment.

## 2.3 Laboratory analyses

### 2.3.1 Sediment slurry incubations

For each incubation, approximately 60 mL (82 ± 2.5 g) of wet sediment and 60 mL of water were incubated in a 250-mL serum bottle in the dark at approximately 14.0 °C. In order to remove oxygen introduced to the inundated sediments during sample collection and slurry making, each bottle was made anoxic by purging it with N<sub>2</sub> gas for five minutes. Since incubation temperature was generally lower than average wetland temperature (June: 17.2 ± 0.9 °C, August: 18.4 ± 1.3 °C), estimated rates of CH<sub>4</sub> production potential were considered conservative. However, we do acknowledge that CH<sub>4</sub> production potentials generated by bottle incubations may not exactly reproduce CH<sub>4</sub> production rates in these ecosystems. Headspace samples (10 mL) were removed at 2, 5, 8, 11, and 14 days, injected into a 2-mL serum vial (pre-evacuated with a vacuum pump), sealed with silicone, and stored upside down in water for less than three months until the samples could be analyzed using gas chromatography. To maintain atmospheric pressure in the slurry incubations, 10 mL of N<sub>2</sub> gas was added after each sampling point. CH<sub>4</sub> concentrations were measured using an Agilent 6890 gas chromatograph equipped with a flame ionization detector

(Agilent Technologies, Santa Clara, CA, USA) as detailed by West et al. (2015). After accounting for headspace dilution due to sampling, CH<sub>4</sub> production rates were inferred from the slope of the linear regressions of CH<sub>4</sub> concentrations over time and are reported as **nmol CH<sub>4</sub> per g of dry sediment per day** (nmol g<sup>-1</sup> day<sup>-1</sup>).

### 2.3.2 Physicochemical measurements

5 Temperature, pH, dissolved oxygen, specific conductivity, and salinity were measured at each sampling location using a YSI Pro Plus multiparameter water quality meter (YSI, Yellow Springs, OH, USA). Dissolved organic carbon was analyzed using a Shimadzu TOC-VCSH (Shimadzu Scientific Instruments, Kyoto, Japan). **All samples, with the exception of five of the tidal brackish samples, registered above the lowest standard (1 mg/L); the five exceptions registered between the blanks and the lowest standard.** Acetate, nitrate, and sulfate concentrations were analyzed using a Dionex ICS-5000 (Thermo Fisher Scientific, Sunnyvale, CA, USA), but only sulfate was **detectable** in the water column. **Detection limits for acetate, nitrate, and sulfate were approximately 10, 2, and 1 μM, respectively.** Water chemistry analyses were performed using instrumentation at the University of Notre Dame Center for Environmental Science and Technology.

### 2.3.3 Sediment organic matter and porewater chemistry

15 To examine starting conditions for each CH<sub>4</sub> production assay, a subsample of sediment was frozen at the start of the incubation for later analysis. A portion of each subsample was dried for at least 48 hours at 60 °C, and the dry weight was recorded. Subsequently, the organic matter in the sediment was combusted at 500 °C for four hours, and the sediment was re-wetted and then dried at 60 °C for at least 48 hours before re-weighing (Steinman et al., 2011). Sediment organic matter was estimated as the percent of sediment material lost during combustion (**SOM %**) and converted to the total sediment organic carbon (Thomas et al., 2005) available per g of dry sediment (Table 2). To extract porewater from the sediment, another portion (~ 50 mL) was 20 centrifuged for 45 minutes at 4 °C at ~ 4000 RCF. The total volume of supernatant per volume of sediment was recorded, and a subsample of the porewater was also analyzed on the Dionex ICS-5000 for acetate, nitrate, and sulfate. **To account for the widely differing porewater volumes we were able to extract from sediment (0.17 ± 0.09 ml porewater per mL of sediment), porewater concentrations were converted to the total amount of each anion (nmol) per g of dry sediment (i.e., μM x porewater volume in incubation x porewater volume per mL of sediment x sediment volume in bottle / mass of dry sediment x 1000;** 25 **Table 2).**

### 2.3.4 Microbial analyses

DNA was extracted from frozen sediments used in other analyses, including multiple June tidal brackish sediments (n = 10), the freshwater sediments used in the sea-level rise simulation (n = 5), and a composite of the five sediment samples (1 g sediment per sample was added to make a 5-g composite) from the nine freshwater wetlands for the June time period (n = 9), 30 according to the manufacturer's protocol with a PowerSoil DNA isolation kit (Mo Bio, Carlsbad, CA, USA). **We chose to make composites for microbial analyses of the non-tidal freshwater wetlands for the purpose of controlling analytical costs**

while controlling for the significant spatial heterogeneity in these ecosystems. Extracted DNA served as a template for quantitative PCR (qPCR) targeting of two genes – the alpha subunit of methyl coenzyme reductase (*mcrA*) and the alpha subunit of dissimilatory sulfite reductase (*dsrA*). The *mcrA* gene catalyzes the reduction of a methyl group to CH<sub>4</sub> (Thauer, 1998), and is possessed by all known methanogens thereby making it ideal for quantifying methanogen abundance (Luton et al., 2002; Earl et al., 2003; Castro et al., 2004). The *dsrA* gene catalyzes the final step in sulfate respiration, and its ubiquity in sulfate-reducing bacteria makes it powerful at assessing their abundance (Wagner et al., 1998; Klein et al., 2001; Zverlov et al., 2005). Although the number of genes does not necessarily equate with number of cells or gene activity, qPCR of functional genes for particular guilds is a commonly used approach to estimate the abundance of a functional group and these gene abundances have been correlated with functional processes such as CH<sub>4</sub> production (e.g., Morris et al., 2015).

The *mcrA* and *dsrA* genes were amplified using a 20- $\mu$ L qPCR reaction in a Mastercycler ep realplex<sup>2</sup> gradient S (Eppendorf, Hamburg, Germany), using SYBR Green as the reporter dye. Each reaction contained 1  $\mu$ L of brackish or freshwater wetland DNA template and was conducted using the PerfeCTa SYBR Green FastMix (Quanta BioSciences). For the *mcrA* qPCR, primer details and thermocycling conditions in West et al. (2012) were replicated except that we employed a fluorescent detection step at 78 °C for 20 seconds. For the *dsrA* qPCR primer, details and thermocycling conditions in Kondo et al. (2008) were replicated. Melting curves for both *mcrA* and *dsrA* were run to ensure absence of non-specific amplification. Amplification, fluorescence data collection, and initial data analysis were all performed by the Eppendorf realplex<sup>2</sup> software.

Standard qPCR curves for *mcrA* and *dsrA* were generated by pooling gel-extracted amplicons containing our qPCR primer sites from a subset of our non-tidal freshwater and tidal brackish wetland samples. We amplified *mcrA* using primers detailed in Luton et al. (2002) and thermocycling conditions in West et al. (2012), and *dsrA* by replicating primer details and thermocycling conditions in Kondo et al. (2008). After amplification, we used gel electrophoresis and an Invitrogen PureLink Quick Gel Extraction Kit (Invitrogen, Carlsbad, CA, USA) to isolate the *mcrA* and *dsrA* amplicons. Following clean-up, we quantified the purified amplicons using Invitrogen's Qubit technology. We then used serial ten-fold dilutions of these genes to generate standard curves for qPCR. Our detection limit for each gene was approximately 1000 copies per g of wet sediment. Samples below detection were assigned a value of 999 copies per g for further analysis. We ran triplicate analyses of all samples for both the *mcrA* and *dsrA* qPCR, the averages of which were used in summary statistics and analyses.

## 2.4 Statistical analyses

For the non-tidal freshwater (n = 18, 9 sites x 2 time periods) and tidal brackish wetland comparison (n = 10, 5 sites x 2 time periods), we analyzed how four factors influenced log-transformed CH<sub>4</sub> production rates using generalized linear models (GLM) and Akaike Information Criterion (AIC) based model selection. The four factors were: (1) ecosystem type (non-tidal freshwater or tidal brackish), (2) time period (June or August), (3) porewater acetate availability (nmol g<sup>-1</sup> dry sediment), and (4) total sulfate present (nmol g<sup>-1</sup> dry sediment). As nitrate availability was extremely low in these ecosystems in comparison



to total sulfate availability (i.e., ~5%), we did not include nitrate as a factor in the GLMs. AIC-based model selection identifies the most likely model given the data while penalizing for model complexity (i.e., the number of parameters). In our analysis, we corrected for small sample sizes (AIC<sub>c</sub>; Burnham and Anderson 2002). The model with the lowest AIC<sub>c</sub> value is considered the most likely, and all remaining models are compared relative to the most likely model using delta AIC<sub>c</sub> ( $\Delta_i$ ). Models with a  $\Delta_i$  less than or equal to 2 are considered to have substantial support, while models having a  $\Delta_i$  greater than 7 have little support (Burnham and Anderson 2002). The relative strength of our candidate models was then evaluated with Akaike weights ( $\omega_i$ ), which indicate the probability of a model being the most likely model, given the data and the set of candidate models (Burnham and Anderson 2002). We considered 16 candidate models (all possible additive combinations of the four factors including the null model) using the methods described above. A subset of those models, excluding the null model (i.e., intercept only) and those with relatively low support ( $\Delta_i > 4$ ), were then used to determine model-averaged parameter estimates and to estimate the relative importance of variables (Burnham and Anderson, 2002). To estimate the relative importance of predictor variable  $x$ , we used the sum of Akaike weights for models including variable  $x$  (the closer the sum is to 1, the more important the variable  $x$ ); we only considered models where  $\Delta_i < 4$  for this analysis (Burnham and Anderson, 2002).

To compare the abundance of methanogens and sulfate-reducing bacteria, we first used a chi-squared test for each gene to determine whether the presence/absence of *mcrA* or *dsrA* was independent of ecosystem type. We then used a non-parametric Kruskal-Wallis tests to determine whether the number of copies of *mcrA* or *dsrA* varied by ecosystem type. For all statistical analyses excluding AIC model selection,  $\alpha$  was set 0.05.

For the sea-level rise simulation, we conducted a paired *t*-test to determine whether CH<sub>4</sub> production rates in non-tidal freshwater wetland sediments were affected by being flooded with tidal brackish water instead of freshwater from their respective wetlands. Pearson correlations were computed (Zar, 2010) to determine whether porewater acetate or total sulfate levels were related to CH<sub>4</sub> production rates during this experiment.

To determine whether adding organic matter affected CH<sub>4</sub> production rates, we first used an analysis of variance (ANOVA) with treatment (i.e., macrophyte species) as the factor of interest and non-tidal freshwater wetland as a blocking variable. Then we analyzed how three factors influenced the response of each sediment, or  $\Delta$ CH<sub>4</sub> production (treatment–control), using additive GLMs. The three factors were: (1) macrophyte species added, (2) total acetate available in the porewater (nmol g<sup>-1</sup> dry sediment), and (3) total amount of sulfate present (nmol g<sup>-1</sup> dry sediment). A total of eight candidate models (all possible additive combinations of the three factors including the null model) were compared as described above. To determine whether macrophyte species stoichiometry influenced the response of methanogens to increased organic matter, linear regressions were computed for % C, % N, % P, C:N, and C:P against  $\Delta$ CH<sub>4</sub> production. All statistical analyses were conducted in the R software environment using the base and MuMIn packages (R Development Core Team, 2016).



## 3 Results

### 3.1 Non-tidal freshwater and tidal brackish wetland comparison

#### 3.1.1 Water column and porewater chemistry

Water column and sediment porewater chemistry of the incubations varied more by ecosystem type than by time period (Tables 1 & 2). Total sulfate levels in non-tidal freshwater incubations (June:  $84 \pm 65$ ; August:  $48 \pm 43$  nmol gram<sup>-1</sup> dry sediment; mean  $\pm$  sd) were about two orders of magnitude lower than in tidal brackish incubations (June:  $4300 \pm 4300$ ; August:  $3500 \pm 3700$  nmol gram<sup>-1</sup> dry sediment) and did not vary between time periods. In comparison to total sulfate levels, porewater nitrate availability was very low, with non-tidal freshwater wetlands (June:  $1.5 \pm 0.9$ ; August:  $1.8 \pm 1.8$  nmol gram<sup>-1</sup> dry sediment) having relatively higher nitrate than the tidal brackish wetlands (June:  $0.24 \pm 0.51$ ; August:  $0.0092 \pm 0.0025$  nmol gram<sup>-1</sup> dry sediment; Table 2). The total amount of acetate available in the non-tidal freshwater wetland incubations was similar in June ( $28 \pm 22$  nmol gram<sup>-1</sup> dry sediment) and August ( $30 \pm 17$  nmol gram<sup>-1</sup> dry sediment), while levels in the tidal brackish wetland incubations were generally higher and more variable especially in August ( $210 \pm 260$  nmol gram<sup>-1</sup> dry sediment) than in June ( $130 \pm 80$  nmol gram<sup>-1</sup> dry sediment).

#### 3.1.2 CH<sub>4</sub> production

CH<sub>4</sub> production rates were higher in non-tidal freshwater wetlands than in tidal brackish wetlands and approximately an order of magnitude higher in both ecosystems in August compared to June (Fig. 3). Porewater acetate positively influenced CH<sub>4</sub> production rates, while total sulfate availability negatively influenced CH<sub>4</sub> production rates (Table 3). The most likely model contained all four factors – ecosystem type, time period, acetate, and total sulfate (Table 3). Based upon model averaging of the top three models (Table 3), all four factors appeared to influence CH<sub>4</sub> production with the relative importance of these variables being 1.00 for ecosystem, 1.00 for porewater acetate, 0.87 for total sulfate availability, and 0.74 for time period.

#### 3.1.3 Functional group abundances

Tidal brackish sediments tended to have higher abundances of sulfate-reducing bacteria when present, while non-tidal freshwater sediments were characterized by higher numbers of methanogens. In the tidal brackish wetlands, three out of ten samples were below the detection limit for the *dsrA* gene, our proxy for sulfate-reducing bacteria abundance, but we detected this gene in all nine non-tidal freshwater wetland composite samples. The presence or absence of the *dsrA* gene was independent of ecosystem type ( $\chi^2 = 3.21$ ,  $df = 1$ ,  $P = 0.07$ ). Tidal brackish sediments ( $n = 10$ ) and non-tidal freshwater wetland sediments ( $n = 9$ ) had  $3.52 \pm 5.39 \times 10^5$  and  $5.20 \pm 5.08 \times 10^4$  copies of *dsrA* per gram of wet sediment, respectively. Due to high variability, the number of copies of *dsrA* did not differ significantly by ecosystem (Kruskal-Wallis:  $H = 1.31$ ,  $df = 1$ ,  $P = 0.25$ ). In contrast, we detected the *mcrA* gene, our proxy for methanogen abundance, in only two out of ten tidal brackish samples, but in all nine non-tidal freshwater wetland samples. The presence or absence of the *mcrA* gene was dependent on

ecosystem type ( $\chi^2 = 12.44$ ,  $df = 1$ ,  $P = 0.0004$ ). Tidal brackish samples had  $2.14 \pm 5.78 \times 10^4$  copies of the *mcrA* per gram of wet sediment, while non-tidal freshwater wetlands had  $1.84 \pm 1.25 \times 10^5$  copies of *mcrA* per gram of wet sediment. Methanogen abundance therefore differed significantly between ecosystem types (Kruskal-Wallis:  $H = 11.24$ ,  $df = 1$ ,  $P = 0.0008$ )

### 3.2 Sea-level rise simulation

- 5 Flooding of fully inundated non-tidal freshwater wetland sediments with brackish water did not affect CH<sub>4</sub> production rates (Fig. 4). Even though total sulfate levels increased from  $63 \pm 37$  to  $5400 \pm 400$  nmol gram<sup>-1</sup> dry sediment with the addition of tidal brackish water, CH<sub>4</sub> production rates did not differ between treatment and control incubations (paired *t*-test:  $t = 0.44$ ,  $df = 4$ ,  $P = 0.68$ ). However, CH<sub>4</sub> production rates were significantly correlated with porewater acetate levels ( $r = 0.88$ ,  $t = 5.18$ ,  $df = 8$ ,  $P = 0.0008$ ), but not with total sulfate levels ( $r = 0.09$ ,  $t = 0.24$ ,  $df = 8$ ,  $P = 0.81$ ). The non-tidal freshwater wetland
- 10 sediments used in this biogeochemical sea-level rise simulation ( $n = 5$ ) had about an order of magnitude higher number of copies of *mcrA* ( $3.12 \pm 4.40 \times 10^5$ ) than *dsrA* ( $5.32 \pm 6.33 \times 10^4$ ) per gram of wet sediment.

### 3.3 Increased organic matter simulation

- The organic matter treatments significantly influenced CH<sub>4</sub> production rates ( $F_{4, 16} = 4.48$ ,  $P = 0.01$ ), but this effect varied with macrophyte species (Fig. 5). Adding buckbean and marestalk had little effect on CH<sub>4</sub> production, while the lily and horsetail
- 15 treatments generally increased methanogen activity (Fig. 5). The most likely model for predicting  $\Delta$ CH<sub>4</sub> production (treatment – control) included acetate availability, which had a negative effect on the response (Table 4). The next best models included porewater acetate and species (Model 2) or porewater acetate and total sulfate availability (Model 3), which had a positive effect on the response (Table 4). Models 1–4 (Table 4) were averaged to determine parameter estimates with the relative importance of the variables being 0.88 for porewater acetate, 0.33 for macrophyte species, and 0.15 for total sulfate availability.
- 20 Using the model-averaged parameters, our predictions of the response of CH<sub>4</sub> production rates to increased substrate availability closely followed the observed results (Fig. 6). Finally, macrophyte species stoichiometry (i.e., % C, % N, % P, C:N, and C:P) had no effect on  $\Delta$ CH<sub>4</sub> production ( $r^2 < 0.08$ ,  $P > 0.24$  for all regressions).

## 4 Discussion

- To begin to understand likely responses of wetlands to global change processes, we conducted a space-for-time substitution of
- 25 how sea-level rise might affect CH<sub>4</sub> production in freshwater wetlands by comparing them to brackish systems. We found that CH<sub>4</sub> production was lower in tidal brackish than in non-tidal freshwater wetlands, likely due to differences in redox state (i.e., higher sulfate levels in the tidal brackish) and in microbial communities (i.e., lower methanogen abundances in the tidal

brackish). Short-term simulation of sea-level rise in non-tidal freshwater sediments (~14 d), however, did not influence CH<sub>4</sub> production rates. In contrast, higher organic matter availability generally enhanced CH<sub>4</sub> production rates in 75% of incubations, but this response varied by macrophyte species and the amount of substrate already available. Because acetate and sulfate availability had contrasting effects depending on the experiment (i.e., freshwater/brackish comparison vs. increased organic matter), these results demonstrate that the interaction of global change mechanisms must be considered when modeling the future contribution of coastal wetlands to the global CH<sub>4</sub> budget (Fig. 1).

#### 4.1 Non-tidal freshwater and tidal brackish wetland comparison

CH<sub>4</sub> production rates in tidal brackish wetlands were substantially lower than those of non-tidal freshwater wetlands, as predicted. Many studies have attributed the decrease in wetland CH<sub>4</sub> emissions along increasing salinity and sulfate concentrations to sulfate-reducing bacteria outcompeting methanogens for substrates (DeLaune et al., 1983; Bartlett et al., 1987; Magenheimer et al., 1996; Poffenbarger et al., 2011), but none of these studies directly assessed whether lower CH<sub>4</sub> emissions resulted from reduced CH<sub>4</sub> production or higher CH<sub>4</sub> oxidation. Two recent studies documented lower CH<sub>4</sub> production with elevated salinity (Chambers et al. 2013; Neubauer et al. 2013), and attempted to link C mineralization rates to extracellular enzymes, but microbial communities were not quantified. In comparison, our study quantified CH<sub>4</sub> production along a similar spatial gradient and directly linked lower CH<sub>4</sub> production to higher sulfate availability and indirectly to relative abundance of functional microbial guilds. The presence of alternative electron acceptors such as sulfate likely signals that methanogens have to compete for organic substrates with sulfate-reducing bacteria (Oremland and Polcin, 1982; Lovley and Klug, 1986; Achtnich et al., 1995). Our study also demonstrates that tidal brackish sediments tended to have generally higher sulfate-reducing bacteria (*dsrA*) abundances when present, but significantly lower levels of methanogens (*mcrA*) than non-tidal freshwater sediments. Although we did not include microbial data in the model selection due to sample size limitations, we hypothesize that microbial community differences could help to explain why ecosystem type (freshwater vs. brackish) was an important factor during model selection. Collectively, these results along with higher sulfate availability in tidal brackish wetlands (and sulfate's importance in our model selection analysis) suggest that shifts in the relative abundance of functional microbial guilds between tidal brackish and non-tidal freshwater wetlands contribute to differences in CH<sub>4</sub> production between these ecosystems.

The difference between brackish and freshwater wetland CH<sub>4</sub> production could also be shaped by other ecosystem factors such as salinity and salinity-induced cation exchange. Because salinity and sulfate availability are often correlated, it can be difficult to disentangle these two factors; Chambers et al. (2011) isolated their effects in a laboratory manipulation and found that seawater (sulfate) had a more dramatic and longer lasting effect on CH<sub>4</sub> production than saltwater (NaCl). Nevertheless, salinity often places additional stress on organisms such that saltwater intrusion alters microbial and plant

communities (Herbert et al. 2015). Additionally, saltwater intrusion can influence cation exchange in the sediments such that calcium is mobilized, which can co-precipitate with phosphate, thereby releasing ammonium, all of which can shift a wetland towards P rather than N limitation (Herbert et al. 2015; van Dijk et al. 2015). Although we did not directly measure these effects of salinity and therefore cannot rule them out, we hypothesize that sulfate availability and differences in functional microbial guilds are primarily responsible for differences in CH<sub>4</sub> production rather than salinity and salinity-induced cation exchange. Our hypothesis relies on three observations: (1) N and P availability were extremely low in both freshwater and brackish ecosystems (DIN: < 25 μg N L<sup>-1</sup>, SRP: < 15 μg P L<sup>-1</sup>) and therefore different sediment cation exchange capacities were unlikely to change the N and P limitation of these wetlands, (2) salinity tended to be consistently low in freshwater wetlands, but CH<sub>4</sub> production was still negatively correlated with sulfate availability, and (3) sulfate availability was an important factor in ecosystem comparison model selection, and was the only factor where a direct mechanistic link can be made to the differences in CH<sub>4</sub> production between freshwater and brackish ecosystems (i.e., acetate availability was higher in brackish wetlands and therefore one might expect higher CH<sub>4</sub> production).

In addition to the influences of microbial communities and redox conditions on CH<sub>4</sub> production, acetate availability appeared to be an important factor. Substrate availability regulates CH<sub>4</sub> production (Whalen, 2005), and acetate is one of the major precursors for methanogenesis (Conrad, 1999) as it can be a direct (acetoclastic) or an indirect (hydrogentrophic) substrate for methanogens after further fermentation. Although the importance of acetate as a factor in our experiments suggests that acetoclastic methanogenesis may be prevalent in the CRD, we cannot rule out the potential of hydrogenotrophic methanogenesis, which is thought to be the primary pathway in other Alaskan wetlands (Hines et al., 2001). According to Hines et al. (2008), acetate tended to accumulate in Alaskan peat rather than be converted to CH<sub>4</sub> possibly due to homoacetogenic bacteria (i.e., those that make acetate) being able to outcompete methanogens for CO<sub>2</sub> and H<sub>2</sub> in colder temperatures and the general lack of acetoclastic methanogens. In contrast, CH<sub>4</sub> production in CRD wetlands was tightly coupled to acetate availability in the ecosystem comparison as well as in both simulations. Despite the differences between these Alaskan wetlands (CRD sediment is more similar to clay than to peat; see SOM % in Table 2), CRD freshwater wetlands exhibited similar CH<sub>4</sub> production rates to those conducted during August 2001 by Hines et al. (2008), which ranged from about 10 to 500 nmol g<sup>-1</sup> dry peat day<sup>-1</sup>. Because CH<sub>4</sub> production rates in Alaskan peat tended to increase with higher proportions of vascular plant cover (Hines et al. 2008) and the fermentation of this plant matter facilitates the production of acetate, it is possible that the role of the acetoclastic pathway may grow more important in northern wetlands in the future as vascular plant growth increases (Klady et al., 2011).

CH<sub>4</sub> production rates often vary seasonally as a function of temperature, but we observed August rates that were an order of magnitude higher than those conducted in June despite these incubations being conducted at the same temperature. Other factors affecting CH<sub>4</sub> production that could vary seasonally include (1) availability of organic matter such as acetate for

CH<sub>4</sub> production (Whiting and Chanton, 1993; Walter et al., 2001), (2) redox conditions including sulfate concentrations (Sinke et al., 1992), (3) microbial population densities (Yannarell and Triplett, 2005), or (4) the pathway by which CH<sub>4</sub> is produced (Avery et al., 1999). In our study, we did not observe large seasonal differences in porewater acetate or sulfate availability in CRD wetlands, but we did not assess seasonal variation in the abundances of methanogens and sulfate-reducing bacteria, their per-cell activity rates, or availability of H<sub>2</sub> or methanogenic substrates other than acetate. Therefore, it is possible that the observed seasonal differences in CH<sub>4</sub> production rates were the result of microbial community shifts, decreased per-cell activity of methanogens in June, greater CH<sub>4</sub> produced from the hydrogenotrophic pathway during August as acetate levels did not change, or some combination of these potential explanations. Additionally, we acknowledge that the porewater acetate level we measured is an indicator of the balance between acetogenesis and acetate consumption, so it is possible that acetogenesis rates increased during August and the acetoclastic pathway of methanogenesis correspondingly increased such that acetate availability appeared to be similar during these two months. Although we did not collect the data that satisfactorily explain these intriguing seasonal differences, we hypothesize that CH<sub>4</sub> production rates vary in accordance with macrophyte phenology in these ecosystems, which clearly affects both redox conditions and microbial processing rates. For example, in early growing season, CH<sub>4</sub> production is low, but steeply increases at peak growing season as more labile plant exudates are produced. The end of the growing season results in plant senescence, increased organic matter availability as plants decompose, and reduced oxygen levels, which then results in higher CH<sub>4</sub> production until colder temperatures start to decelerate microbial processing. All of these conditions could lead to seasonal succession in microbial communities and their activity rates. Future studies should seek to explain the mechanism behind seasonal differences in CH<sub>4</sub> production that are independent of temperature.

#### 4.2 Sea-level rise simulation

Despite our finding that CH<sub>4</sub> production rates were significantly lower in tidal brackish wetlands sites, simulating the biogeochemical effects of sea-level rise in non-tidal freshwater sediments surprisingly did not affect CH<sub>4</sub> production rates. We acknowledge that our experiment simulated short-term consequences of sea-level rise such as increased sulfate availability and the addition of other marine nutrients and microbial communities, but we were not simulating longer term changes such as differences in plant communities and production that may result from increased salinity (Neubauer 2013; Hopfensperger et al. 2014; Herbert et al. 2015). Nevertheless, many other short-term studies conducting similar sea-level rise simulations have observed a decrease in CH<sub>4</sub> production rates with elevated salinity (DeLaune et al. 1983; Chambers et al. 2011; Marton et al. 2012; Chambers et al. 2013; Neubauer et al. 2013; van Dijk et al. 2015). In many of these studies, however, sulfate availability was much higher. For example, DeLaune et al. (1983) found that CH<sub>4</sub> production was inhibited with the addition of ~10 mM sulfate, which is higher than the sulfate concentration (~6 mM) used in this study. Chambers et al. (2011) observed a reduction in the treatments where sulfate concentrations were about 130 and 320 μmol per g<sup>-1</sup> of dry sediment, which is about two orders

of magnitude larger than our sea-level rise simulation ( $5 \mu\text{mol g}^{-1}$  of dry sediment). Additionally, the majority of all these experiments were conducted at 25–30°C, or almost double the temperature used in this study (14°C), which could increase the rates at which microbial communities and their activities respond. It is therefore likely that the external environmental conditions imposed, such as the temperature, salinity, or sulfate availability used in a sea-level rise simulation, can influence the results.

In addition to environmental conditions, initial factors such as soil characteristics or site properties may mediate how methanogens respond to sea-level rise simulations (Neubauer et al. 2013). For example, van Dijk et al. (2015) found that elevated salinity decreases  $\text{CH}_4$  production in peat but not in clay, and the sediment of the CRD wetlands is claylike in nature. Additionally, in some of these experiments, the sediments prior to incubation had been exposed to higher levels of sulfate (e.g., brackish sediments used by DeLaune et al. 1983) and were therefore more likely primed for sulfate reduction and the corresponding increase in competition for organic substrates. In contrast, the freshwater sediments used in this simulation had lower sulfate availability, and the sulfate-reducing bacteria abundances were an order of magnitude lower than methanogens. In some cases, however, sulfate reduction can increase without a corresponding decrease in  $\text{CH}_4$  production (Hopfensperger et al. 2014), especially if saltwater intrusion increases both sulfate and organic matter availability (Weston et al. 2011).

Sea-level rise could therefore affect both redox conditions and organic matter availability, but their contrasting effects on  $\text{CH}_4$  production are mediated by microbial communities and processes. Although the presence of sulfate-reducing bacteria was detectable in the sediments used in this simulation, we do not know whether these taxa were active or dormant. In fact, dormant taxa can account for almost 40% of taxon richness in nutrient-poor systems (Jones and Lennon, 2010), such as the CRD freshwater wetlands. Additionally, we conducted 14-day incubations, which may have been too short to allow for shifts in the relative abundance of sediment microbial populations (Hoehler and Jørgensen, 2013). For example, Edmonds et al. (2009) found no changes in microbial community composition of bacteria or archaea after sediment cores had been exposed to seawater for 35 days. We therefore hypothesize that the reason that  $\text{CH}_4$  production in freshwater sediments did not respond to the sea-level rise simulation is a combination of environmental conditions, initial sediment factors, and a lag in response time from the microbial communities.

### 4.3 Increased organic matter simulation

Higher availability of organic matter generally increased  $\text{CH}_4$  production rates, but this effect varied with the species of macrophyte added to the incubations. Differences in litter quality is known to influence methanogen communities and  $\text{CH}_4$  production (Yavitt et al., 1990; 2000; Valentine et al., 1994). For example, West et al. (2012) found that adding algal carbon significantly enhanced  $\text{CH}_4$  production relative to terrestrial carbon. Although aquatic macrophyte carbon may be of lower quality than that of algae, aquatic macrophytes are generally more labile than terrestrial plants (Schlickeisen et al., 2003). For

example, Tiegs et al. (2013) found that terrestrial plants decomposed more slowly than aquatic macrophytes in CRD wetlands. Additionally, Tiegs et al. (2013) conducted a decomposition assay of all the macrophyte species used in this study, as a way of assessing litter quality, and found that buckbean and lily leaves decomposed at about the same rate, but both were faster than maretail and horsetail. The rate of decomposition of different plant species was correlated with phosphorus content, and therefore indicative of litter quality differences (Tiegs et al., 2013). However, our CH<sub>4</sub> production response did not follow the decomposition pattern documented by Tiegs et al. (2013); we observed higher CH<sub>4</sub> production for the lily and horsetail treatment relative to the control, but not for buckbean and maretail. We also did not find that the CH<sub>4</sub> production response to organic matter treatment varied by % C, % N, % P, C:N, C:P, or any other measure of litter quality assessed by Tiegs et al. (2013).

Other measures of litter quality beyond elemental composition could explain differences in the methanogen response. West et al. (2015), for example, found that higher lipid content of phytoplankton enhanced CH<sub>4</sub> production rates. Alternatively, certain properties may influence the fermentative microbial communities associated with vegetation during decomposition (Boon et al., 1996), which are responsible for providing methanogenic substrates. For example, in a survey of 209 plants, Bishop and MacDonald (1951) reported that buckbean was one of the 10 most active species for antibacterial substances, while horsetail did not possess such properties. Specifically, buckbean extracts include aucubin, a defensive compound that can inhibit many strains of anaerobic bacteria (Weckesser et al., 2007). Maretail also contains aucubin as well as a verbascoside, another antimicrobial compound (Damtoft et al., 1994). In contrast, the only part of lily linked to potential antimicrobial properties is the rhizomes, which have been used in folk medicine (Padgett, 2007) and are more likely to require defensive compounds because of competition with the sediment microbial community than the floating leaves we used for this experiment. Therefore, we hypothesize that CH<sub>4</sub> production varied as a function of a different measure of litter quality than previously put forward (e.g., C:N:P, percent lignin, or lipid content), whereby the negative effects of the antimicrobial properties of buckbean and maretail on the fermentative bacteria superseded the positive effect of increasing the amount of organic matter. We suggest that this hypothesis is worthy of further examination.

Many other studies have documented that CH<sub>4</sub> production is enhanced by the addition of direct substrates such as acetate and H<sub>2</sub> (Williams and Crawford, 1984; Bachoon and Jones, 1992; Amaral and Knowles, 1994; Coles and Yavitt, 2002; Yavitt and Seidman-Zager, 2006), or the addition of indirect substrates such as dextrose and glucose (DeLaune et al., 1983; Williams and Crawford, 1984; Coles and Yavitt, 2002), which would need to be broken down by fermentative bacteria before methanogens could utilize them. Fewer studies have examined the effects of more biologically realistic, indirect substrates such as plant or algal matter on CH<sub>4</sub> production incubations (but see Valentine et al., 1994; West et al., 2012; 2015). However, two studies involving larger scale plots with elevated CO<sub>2</sub> levels exhibited greater photosynthetic rates and greater CH<sub>4</sub> emissions (Megonigal and Schlesinger 1997; Vann and Megonigal 2003). Although Vann and Megonigal (2003) observed



enhanced plant biomass that was strongly correlated with CH<sub>4</sub> emissions, Megonigal and Schlesinger (1997) did not see increased biomass and therefore hypothesized that lower transpiration rates, not increased substrate availability, led to higher CH<sub>4</sub> emissions by increasing flooding duration and stimulating anaerobic processes. In our study, increased substrate availability is likely the mechanism behind increased CH<sub>4</sub> production because our smaller scale simulation did not alter flooding duration, anaerobic conditions, or the physical structures by which plants can act as conduits for gas exchange (i.e., aerenchyma). Interestingly, the amount of acetate already available in the sediment appeared to moderate the methanogen response to enhanced substrate availability. The negative relationship between  $\Delta$ CH<sub>4</sub> production and porewater acetate concentration suggests that methanogenic substrate concentrations can become saturated, which is expected from traditional Michaelis-Menten enzyme kinetics.

Another indication of substrate limitation is the positive relationship between the methanogenic response to added organic matter and the total amount of sulfate available in the incubation. This alternative electron acceptor provides more energy than either methanogenic pathway (acetoclastic or hydrogenotrophic) when coupled to the oxidation of organic matter (Stumm and Morgan, 1996; Schlesinger and Bernhardt, 2013). For example, Westermann and Ahring (1987) found that inhibiting sulfate reduction stimulated CH<sub>4</sub> production in an alder swamp, suggesting that methanogens and sulfate-reducing bacteria compete for common substrates. Sulfate availability, therefore, may signal strength of competition for electron donors (organic matter) that methanogens must overcome to produce CH<sub>4</sub>. The higher the competition, the more likely that methanogens respond positively to the addition of organic matter. The response of methanogens to increased substrate availability, therefore, is likely regulated by the quality of the substrate (e.g., C:P, lipid content, or antimicrobial compounds), strength of competition for substrate (e.g., redox conditions, microbial community assemblages, or per-cell activity rates), and whether substrate availability is limiting or saturated in the environment. Although total sulfate availability played a less significant role than acetate and macrophyte species, the model using averaged estimates from all three parameters allowed us to accurately predict the response in CH<sub>4</sub> production for this experiment.

## 5 Conclusions

Our study demonstrates that potential interactions between elements of global change, specifically sea-level rise, longer grower seasons, and CO<sub>2</sub> fertilization, could have competing effects on CH<sub>4</sub> production from coastal wetlands (Fig. 1). Determining the timescale required for processes at the microbial scale to shift towards sulfate reduction is challenging, and the magnitude of seawater intrusion needed to induce this shift is currently unclear. Microbial community shifts can occur over longer timescales than several months, and CH<sub>4</sub> production can be more affected by long-term salinization (~ 3.5 years) than 2-day salinity pulses (Neubauer et al. 2013). As others have noted, the global carbon cycle is inextricably linked to other

elemental cycles (i.e., sulfur) by processes taking place at the microbial scale (Schimel, 2004; Burgin et al., 2011). In addition, the potential effects of sea-level rise are not limited to CH<sub>4</sub> production alone. Salinization also reduces aerobic and anaerobic methane oxidation, with aerobic organisms being particularly sensitive to salinity (Dalal et al. 2008; Herbert et al. 2015). Furthermore, the effects of sulfate availability on the CH<sub>4</sub> cycle extend beyond sea-level rise to other aspects of global change such as road salts and agricultural land use (Helton et al. 2014; Herbert et al. 2015).

In contrast to sea-level rise and increased sulfate availability, longer growing seasons and CO<sub>2</sub> fertilization will likely enhance carbon substrate supply and in turn CH<sub>4</sub> production. Our study demonstrates that the effect of increased organic matter depends on plant species, the availability of other methanogenic substrates, and the presence of alternative electron acceptors. It is possible that longer growing seasons and CO<sub>2</sub> fertilization could reduce competition between methanogens and other microbial communities by providing more substrates, as we saw in freshwater wetlands with higher sulfate concentrations, thereby superseding the effect of sea-level rise. Additionally, the CO<sub>2</sub> fertilization effect could increase organic matter accretion of marsh plants, which could physically counteract sea-level rise by raising marsh elevation (Langley et al., 2009). Future studies should consider how the interaction of sea-level rise, increased organic matter, and warming will affect both the microbial and ecosystem processes of the global methane cycle. This intersection of global change processes will be particularly important for projecting the future CH<sub>4</sub> budgets of coastal wetland ecosystems.

## 6 Data availability

The data will be freely accessible through the international repository, Knowledge Network for Biocomplexity (KNB) at: <https://knb.ecoinformatics.org/#view/doi:10.5063/F1028PF8>.

*Author contributions.* CV designed the study as sparked from discussions with SEJ. CV and JAH conducted the fieldwork and laboratory analyses. WEW played a key role in methodology and analyzing methane samples with the GC. SEJ and GAL played advisory roles in shaping this research. CV prepared the manuscript with contributions from all co-authors.

*Competing interests.* The authors declare that they have no conflict of interest.

*Acknowledgments.* We thank the Cordova Ranger District of the USDA Forest Service for providing field and logistical support, particularly Deyna Kuntzsch, Andrew Morin, Sean Meade, Luca Adelfio, and Ken Hodges, without whom this work

on the Copper River Delta would not have been possible. We also thank Gordie Reeves of the Pacific Northwest Research Station for his leadership and direction in the extensive research being conducted on the Copper River Delta. Mike Brueseke, Melanie Runkle, and Josephine Chau assisted with DOC and SOM analyses. The Center for Environmental Science and Technology at UND provided instrumentation and analytical assistance for the chemical analyses. Funding was provided by the USDA Forest Service, the Pacific Northwest Research Station, the National Fish and Wildlife Foundation, the University of Notre Dame, and the National Science Foundation Graduate Research Fellowship Program. We also thank members of the Jones laboratory and the Lamberti laboratory at UND for their feedback on the manuscript. We acknowledge Mary Scranton and Scott Neubauer, who put tremendous effort into reviewing this manuscript and whose comments and suggestions greatly improved its quality.

10

## References

- Achnich, C., Bak, F. and Conrad, R.: Competition for electron donors among nitrate reducers, ferric iron reducers, sulfate reducers, and methanogens in anoxic paddy soil, *Biol. Fertil. Soils*, 19(1), 65–72, 1995.
- 15 Amaral, J. A. and Knowles, R.: Methane metabolism in a temperate swamp, *Appl. Environ. Microbiol.*, 60(11), 3945–3951, 1994.
- Avery, G. B., Shannon, R. D., White, J. R., Martens, C. S. and Alperin, M. J.: Effect of seasonal changes in the pathways of methanogenesis on the  $\delta^{13}\text{C}$  values of pore water methane in a Michigan peatland, *Glob. Biogeochem. Cycles*, 13(2), 475–484, 1999.
- 20 Bachoon, D. and Jones, R. D.: Potential rates of methanogenesis in sawgrass marshes with peat and marl soils in the everglades, *Soil Biol. Biochem.*, 24(1), 21–27, 1992.
- 25 Bartlett, K. B., Bartlett, D. S., Harriss, R. C. and Sebacher, D. I.: Methane emissions along a salt marsh salinity gradient, *Biogeochemistry*, 4(3), 183–202, 1987.
- Bishop, C. J. and MacDonald, R. E.: A survey of higher plants for antibacterial substances, *Can. J. Bot.*, 29(3), 260–269, 1951.
- 30 Boon, P., Virtue, P. and Nichols, P.: Microbial consortia in wetland sediments: a biomarker analysis of the effect of hydrological regime, vegetation and season on benthic microbes, *Mar. Freshw. Res.*, 47(1), 27–41, 1996.
- Bryant, M. D.: The Copper River Delta pulse study: an interdisciplinary survey of aquatic habitats, General Technical Report, U.S.D.A., Forest Service, Pacific Northwest Research Station, Portland, Oregon., 1991.
- 35 Burgin, A. J., Yang, W. H., Hamilton, S. K. and Silver, W. L.: Beyond carbon and nitrogen: how the microbial energy economy couples elemental cycles in diverse ecosystems, *Front. Ecol. Environ.*, 9(1), 44–52, 2011.

- Burnham, K. P. and Anderson, D. R.: Model Selection and Multi-Model Inference: A Practical Information-Theoretic Approach, 2nd ed., Springer-Verlag, Inc., New York, NY., 2002.
- 5 Castro, H., Ogram, A. and Reddy, K. R.: Phylogenetic characterization of methanogenic assemblages in eutrophic and oligotrophic areas of the Florida Everglades, *Appl. Environ. Microbiol.*, 70(11), 6559–6568, 2004.
- Chambers, L. G., Reddy, K. R. and Osborne, T. Z.: Short-term response of carbon cycling to salinity pulses in a freshwater wetland, *Soil Sci. Soc. Am. J.*, 75, 2000–2007, 2011.
- 10 Chambers, L. G., Osborne, T. Z. and Reddy, K. R.: Effect of salinity-altering pulsing events on soil organic carbon loss along an intertidal wetlands gradient: a laboratory experiment, *Biogeochemistry*, 115, 363–383, 2013.
- Coles, J. R. P. and Yavitt, J. B.: Control of methane metabolism in a forested northern wetland, New York State, by aeration, substrates, and peat size fractions, *Geomicrobiol. J.*, 19(3), 293–315, 2002.
- 15 Conrad, R.: Contribution of hydrogen to methane production and control of hydrogen concentrations in methanogenic soils and sediments, *FEMS Microbiol. Ecol.*, 28(3), 193–202, 1999.
- 20 Dalal, R., Allen, D., Livesley, S. and Richards, G.: Magnitude and biophysical regulators of methane emission and consumption in the Australian agricultural, forest, and submerged landscapes: a review. *Plant Soil*, 309: 43–76, 2008.
- Damtoft, S., Rosendal Jensen, S., Thorsen, J., Mølgard, P. and Erik Olsen, C.: Iridoids and verbascoside in Callitrichaceae, Hippuridaceae and Lentibulariaceae, *Phytochemistry*, 36(4), 927–929, 1994.
- 25 DeLaune, R. D., Smith, C. J. and Patrick, W. H.: Methane release from Gulf coast wetlands, *Tellus B*, 35B(1), 8–15, 1983.
- Earl, J., Hall, G., Pickup, R. W., Ritchie, D. A. and Edwards, C.: Analysis of methanogen diversity in a hypereutrophic lake using PCR-RFLP analysis of *mcr* sequences, *Microb. Ecol.*, 46(2), 270–278, 2003.
- 30 Edmonds, J. W., Weston, N. B., Joye, S. B., Mou, X. and Moran, M. A.: Microbial community response to seawater amendment in low-salinity tidal sediments, *Microb. Ecol.*, 58(3), 558–568, 2009.
- 35 Freymueller, J. T., Woodard, H., Cohen, S. C., Cross, R., Elliott, J., Larsen, C. F., Hreinsdóttir, S. and Zweck, C.: Active deformation processes in Alaska, based on 15 Years of GPS measurements, in *Active Tectonics and Seismic Potential of Alaska*, edited by J. T. Freymueller, P. J. Haeussler, R. L. Wesson, and G. Ekström, pp. 1–42, American Geophysical Union, 2008.
- 40 Frolking, S. and Roulet, N. T.: Holocene radiative forcing impact of northern peatland carbon accumulation and methane emissions, *Global Change Biol.*, 13, 1079–1088, 2007.
- Gedney, N., Cox, P. M. and Huntingford, C.: Climate feedback from wetland methane emissions, *Geophys. Res. Lett.*, 31(20), 1–4, 2004.

- Helton, A. M., Bernhardt, E. S. and Fedders, A.: Biogeochemical regime shifts in coastal landscapes: the contrasting effects of saltwater incursion and agricultural pollution on greenhouse gas emissions from a freshwater wetland, *Biogeochemistry*, 120, 133–147, 2014.
- 5 Herbert, E. R., Boon, P., Burgin, A. J., Neubauer, S. C., Franklin, R. B., Ardón, M., Hopfensperger, K. N., Lamers, L. P. M. and Gell, P.: The global perspective on wetland salinization: ecological consequences of a growing threat to freshwater wetlands, *Ecosphere*, 6(10), 206, 2015.
- Hines, M. E., Duddleston, K. N. and Kiene, R. P.: Carbon flow to acetate and C1 compounds in northern wetlands, *Geophys. Res. Lett.*, 28(22), 4251–4254, 2001.
- 10 Hines, M. E., Duddleston, K. N., Rooney-Varga, J. N., Fields, D. and Chanton, J. P.: Uncoupling of acetate degradation from methane formation in Alaskan wetlands: Connections to vegetation distribution, *Glob. Biogeochem. Cycles*, 22(2), 2008.
- Hoehler, T. M. and Jørgensen, B. B.: Microbial life under extreme energy limitation, *Nat. Rev. Microbiol.*, 11(2), 83–94, 2013.
- 15 Hopfensperger, K. N., Burgin, A. J., Schoepfer, V. A. and Helton, A. M.: Impacts of saltwater incursion on plant communities, anaerobic microbial metabolism, and resulting relationships in a restored freshwater wetland, *Ecosystems*, 17, 792–807, 2014.
- Jones, S. E. and Lennon, J. T.: Dormancy contributes to the maintenance of microbial diversity, *Proc. Natl. Acad. Sci.*, 107(13), 5881–5886, 2010.
- 20 Kirschke, S., Bousquet, P., Ciais, P., Saunoy, M., Canadell, J. G., Dlugokencky, E. J., Bergamaschi, P., Bergmann, D., Blake, D. R., Bruhwiler, L., Cameron-Smith, P., Castaldi, S., Chevallier, F., Feng, L., Fraser, A., Heimann, M., Hodson, E. L., Houweling, S., Josse, B., Fraser, P. J., Krummel, P. B., Lamarque, J.-F., Langenfelds, R. L., Le Quéré, C., Naik, V., O'Doherty, S., Palmer, P. I., Pison, I., Plummer, D., Poulter, B., Prinn, R. G., Rigby, M., Ringeval, B., Santini, M., Schmidt, M., Shindell, D. T., Simpson, I. J., Spahni, R., Steele, L. P., Strode, S. A., Sudo, K., Szopa, S., van der Werf, G. R., Voulgarakis, A., van Weele, M., Weiss, R. F., Williams, J. E. and Zeng, G.: Three decades of global methane sources and sinks, *Nat. Geosci.*, 6(10), 813–823, 2013.
- 30 Klady, R. A., Henry, G. H. R. and Lemay, V.: Changes in high arctic tundra plant reproduction in response to long-term experimental warming, *Glob. Change Biol.*, 17(4), 1611–1624, 2011.
- Klein, M., Friedrich, M., Roger, A. J., Hugenholtz, P., Fishbain, S., Abicht, H., Blackall, L. L., Stahl, D. A. and Wagner, M.: Multiple lateral transfers of dissimilatory sulfite reductase genes between major lineages of sulfate-reducing prokaryotes, *J. Bacteriol.*, 183(20), 6028–6035, 2001.
- 35 Klinger, L. F., Zimmerman, P. R., Greenberg, J. P., Heidt, L. E. and Guenther, A. B.: Carbon trace gas fluxes along a successional gradient in the Hudson Bay lowland, *J. Geophys. Res. Atmospheres*, 99(D1), 1469–1494, 1994.
- 40 Kondo, R., Shigematsu, K. and Butani, J.: Rapid enumeration of sulphate-reducing bacteria from aquatic environments using real-time PCR, *Plankton Benthos Res.*, 3(3), 180–183, 2008.
- Langley, J. A., McKee, K. L., Cahoon, D. R., Cherry, J. A. and Megonigal, J. P.: Elevated CO<sub>2</sub> stimulates marsh elevation gain, counterbalancing sea-level rise, *Proc. Natl. Acad. Sci.*, 106(15), 6182–6186, 2009.
- 45 Lofton, D. D., Whalen, S. C. and Hershey, A. E.: Effect of temperature on methane dynamics and evaluation of methane oxidation kinetics in shallow Arctic Alaskan lakes, *Hydrobiologia*, 721(1), 209–222, 2014.

- Lovley, D. R. and Klug, M. J.: Sulfate reducers can outcompete methanogens at freshwater sulfate concentrations, *Appl. Environ. Microbiol.*, 45(1), 187–192, 1983.
- 5 Lovley, D. R. and Klug, M. J.: Model for the distribution of sulfate reduction and methanogenesis in freshwater sediments, *Geochim. Cosmochim. Acta*, 50(1), 11–18, 1986.
- Lovley, D. R. and Phillips, E. J. P.: Competitive mechanisms for inhibition of sulfate reduction and methane production in the zone of ferric iron reduction in sediments, *Appl. Environ. Microbiol.*, 53(11), 2636–2641, 1987.
- 10 Luton, P. E., Wayne, J. M., Sharp, R. J. and Riley, P. W.: The *mcrA* gene as an alternative to 16S rRNA in the phylogenetic analysis of methanogen populations in landfill, *Microbiology*, 148(11), 3521–3530, 2002.
- Magenheimer, J. F., Moore, T. R., Chmura, G. L. and Daoust, R. J.: Methane and carbon dioxide flux from a macrotidal salt marsh, Bay of Fundy, New Brunswick, *Estuaries*, 19(1), 139–145, 1996.
- 15 Marton, J. M., Herbert, E. R. and Craft, C. B.: Effects of salinity on denitrification and greenhouse gas production from laboratory-incubated tidal forest soils, *Wetlands*, 32, 347–357, 2012.
- 20 Matthews, H. D.: Implications of CO<sub>2</sub> fertilization for future climate change in a coupled climate–carbon model, *Glob. Change Biol.*, 13(5), 1068–1078, 2007.
- McGuire, A. D., Anderson, L. G., Christensen, T. R., Dallimore, S., Guo, L., Hayes, D. J., Heimann, M., Lorenson, T. D., Macdonald, R. W. and Roulet, N.: Sensitivity of the carbon cycle in the Arctic to climate change, *Ecol. Monogr.*, 79(4), 523–555, 2009.
- 25 Megonigal, J. P. and Schlesinger, W. H.: Enhanced CH<sub>4</sub> emissions from a wetland soil exposed to elevated CO<sub>2</sub>, *Biogeochemistry* 37(1), 77–88, 1997.
- 30 Moore, T. R. and Dalva, M.: The influence of temperature and water table position on carbon dioxide and methane emissions from laboratory columns of peatland soils, *J. Soil Sci.*, 44(4), 651–664, 1993.
- Morris, R. I., Tale, V. P., Mathai, P. P., Zitomer, D. H., and Maki J. S.: *mcrA* gene abundance correlates with hydrogenotrophic methane production rates in full-scale anaerobic waste treatment systems, *Lett. Appl. Microbiol.*, 62(2), 111–118, 2015.
- 35 Neubauer, S. C.: Ecosystem responses of a tidal freshwater marsh experiencing saltwater intrusion and altered hydrology, *Estuaries Coasts*, 36: 491–507, 2013.
- 40 Neubauer, S. C., Franklin, R. B. and Berrier, D. J.: Saltwater intrusion into tidal freshwater marshes alters the biogeochemical processing of organic carbon, *Biogeosciences*, 10, 8171–8183, 2013.
- Neubauer, S. C. and Megonigal, J. P.: Moving beyond global warming potentials to quantify the climatic role of ecosystems, *Ecosystems*, 18, 1000–1013, 2015.
- 45 Oremland, R. S. and Polcin, S.: Methanogenesis and sulfate reduction: competitive and noncompetitive substrates in estuarine sediments, *Appl. Environ. Microbiol.*, 44(6), 1270–1276, 1982.

- Padgett, D. J.: A monograph of Nuphar (Nymphaeaceae), *Rhodora*, 109(937), 1–95, 2007.
- 5 Poffenbarger, H. J., Needelman, B. A. and Megonigal, J. P.: Salinity influence on methane emissions from tidal marshes, *Wetlands*, 31(5), 831–842, 2011.
- Ringeval, B., Friedlingstein, P., Koven, C., Ciais, P., de Noblet-Ducoudré, N., Decharme, B. and Cadule, P.: Climate-CH<sub>4</sub> feedback from wetlands and its interaction with the climate-CO<sub>2</sub> feedback, *Biogeosciences*, 8(8), 2137–2157, 2011.
- 10 Schimel, J.: Playing scales in the methane cycle: From microbial ecology to the globe, *Proc. Natl. Acad. Sci. U. S. A.*, 101(34), 12400–12401, 2004.
- Schlesinger, W. H. and Bernhardt, E. S. S.: *Biogeochemistry: An Analysis of Global Change*, 3rd ed., Academic Press, Waltham, MA., 2013.
- 15 Schlickeisen, E., Tietjen, T. E., Arsuffi, T. L. and Groeger, A. W.: Detritus processing and microbial dynamics of an aquatic macrophyte and terrestrial leaf in a thermally constant, spring-fed stream, *Microb. Ecol.*, 45(4), 411–418, 2003.
- 20 Sinke, A. J. C., Cornelese, A. A., Cappenberg, T. E. and Zehnder, A. J. B.: Seasonal variation in sulfate reduction and methanogenesis in peaty sediments of eutrophic Lake Loosdrecht, The Netherlands, *Biogeochemistry*, 16(1), 43–61, 1992.
- Steinman, A. D., Lamberti, G. A. and Leavitt, Peter R.: Biomass and pigments of benthic algae, in *Methods in Stream Ecology*, edited by F. R. Hauer and G. A. Lamberti, pp. 357–380, Academic Press., 2011.
- 25 Stumm, W. and Morgan, J. J.: *Aquatic Chemistry: Chemical Equilibria and Rates in Natural Waters*, 3rd ed., John Wiley & Sons, Inc., New York, NY., 1996.
- Thauer, R. K.: Biochemistry of methanogenesis: a tribute to Marjory Stephenson, *Microbiology*, 144, 2377–2406, 1998.
- 30 Thilenius, J. F.: Phytosociology and succession on earthquake-uplifted coastal wetlands, Copper River Delta, Alaska, U.S.D.A., Forest Service, Pacific Northwest Research Station., 1995.
- Thomas, S. A., Royer, T. V., Snyder, E. B., and Davis, J. C.: Organic carbon spiraling in an Idaho river, *Aquat. Sci.*, 67(4), 424–433, 2005.
- 35 Tiegs, S. D., Entrekin, S. A., Reeves, G. H., Kuntzsch, D. and Merritt, R. W.: Litter decomposition, and associated invertebrate communities, in wetland ponds of the Copper River Delta, Alaska (USA), *Wetlands*, 33(6), 1151–1163, 2013.
- 40 U.S. Geological Survey: Largest Rivers in the United States. [online] Available from: <http://pubs.usgs.gov/of/1987/ofr87-242/pdf/ofr87242.pdf>, 1990.
- U.S. Global Climate Change Program: *Global climate change impacts in the United States*, Cambridge University Press., 2009.
- 45 Valentine, D. W., Holland, E. A. and Schimel, D. S.: Ecosystem and physiological controls over methane production in northern wetlands, *J. Geophys. Res. Atmospheres*, 99(D1), 1563–1571, 1994.



- van Dijk, G., Smolders, A. J. P., Loeb, R., Bout, A., Roelofs, J. G. M. and Lamers L. P. M.: Salinization of coastal freshwater wetlands; effects of constant versus fluctuating salinity on sediment biogeochemistry, *Biogeochemistry*, 126, 71–84, 2015.
- 5 Vann, C. D. and Megonigal, J. P.: Elevated CO<sub>2</sub> and water depth regulation of methane emissions: comparison of woody and non-woody wetland plant species, *Biogeochemistry* 63, 117–134, 2003.
- Vermeer, M. and Rahmstorf, S.: Global sea level linked to global temperature, *Proc. Natl. Acad. Sci.*, 106(51), 21527–21532, 2009.
- 10 Wagner, M., Roger, A. J., Flax, J. L., Brusseau, G. A. and Stahl, D. A.: Phylogeny of dissimilatory sulfite reductases supports an early origin of sulfate respiration, *J. Bacteriol.*, 180(11), 2975–2982, 1998.
- Walter, B. P., Heimann, M. and Matthews, E.: Modeling modern methane emissions from natural wetlands: 1. Model description and results, *J. Geophys. Res. Atmospheres*, 106(D24), 34189–34206, 2001.
- 15 Walther, G.-R., Post, E., Convey, P., Menzel, A., Parmesan, C., Beebee, T. J. C., Fromentin, J.-M., Hoegh-Guldberg, O. and Bairlein, F.: Ecological responses to recent climate change, *Nature*, 416(6879), 389–395, 2002.
- Weckesser, S., Engel, K., Simon-Haarhaus, B., Wittmer, A., Pelz, K. and Schempp, C. M.: Screening of plant extracts for antimicrobial activity against bacteria and yeasts with dermatological relevance, *Phytomedicine*, 14(7–8), 508–516, 2007.
- 20 West, W. E., Coloso, J. J. and Jones, S. E.: Effects of algal and terrestrial carbon on methane production rates and methanogen community structure in a temperate lake sediment, *Freshw. Biol.*, 57(5), 949–955, 2012.
- 25 West, W. E., McCarthy, S. M. and Jones, S. E.: Phytoplankton lipid content influences freshwater lake methanogenesis, *Freshw. Biol.*, 60(11), 2261–2269, 2015.
- Westermann, P. and Ahring, B. K.: Dynamics of methane production, sulfate reduction, and denitrification in a permanently waterlogged alder swamp, *Appl. Environ. Microbiol.*, 53(10), 2554–2559, 1987.
- 30 Weston, N. B., Vile, M. A., Neubauer, S. C. and Velinsky, D. J.: Accelerated microbial organic matter mineralization following salt-water intrusion into freshwater marsh soils, *Biogeochemistry* 102(1), 135–151, 2011.
- Whalen, S. C.: Biogeochemistry of methane exchange between natural wetlands and the atmosphere, *Environ. Eng. Sci.*, 22(1), 73–94, 2005.
- 35 Whiting, G. J. and Chanton, J. P.: Primary production control of methane emission from wetlands, *Nature*, 364(6440), 794–795, 1993.
- 40 Whiting, G. J. and Chanton, J. P.: Greenhouse carbon balance of wetlands: methane emission versus carbon sequestration, *Tellus B*, 53(5), 521–528, 2001.
- Williams, R. T. and Crawford, R. L.: Methane production in Minnesota peatlands, *Appl. Environ. Microbiol.*, 47(6), 1266–1271, 1984.
- 45

- Winfrey, M. R. and Ward, D. M.: Substrates for sulfate reduction and methane production in intertidal sediments, *Appl. Environ. Microbiol.*, 45(1), 193–199, 1983.
- 5 Yannarell, A. C. and Triplett, E. W.: Geographic and environmental sources of variation in lake bacterial community composition, *Appl. Environ. Microbiol.*, 71(1), 227–239, 2005.
- Yavitt, J. B. and Seidman-Zager, M.: Methanogenic conditions in northern peat soils, *Geomicrobiol. J.*, 23(2), 119–127, 2006.
- 10 Yavitt, J. B., Downey, D. M., Lancaster, E. and Lang, G. E.: Methane consumption in decomposing Sphagnum-derived peat, *Soil Biol. Biochem.*, 22(4), 441–447, 1990.
- Yavitt, J. B., Williams, C. J. and Wieder, R. K.: Controls on microbial production of methane and carbon dioxide in three Sphagnum-dominated peatland ecosystems as revealed by a reciprocal field peat transplant experiment, *Geomicrobiol. J.*, 17(1), 61–88, 2000.
- 15 Zar, J. H.: *Biostatistical Analysis*, 5th ed., Pearson Prentice-Hall, Upper Saddle River., 2010.
- Zverlov, V., Klein, M., Lückner, S., Friedrich, M. W., Kellermann, J., Stahl, D. A., Loy, A. and Wagner, M.: Lateral gene transfer of dissimilatory (bi)sulfite reductase revisited, *J. Bacteriol.*, 187(6), 2203–2208, 2005.

**Table 1.** Water column physical and chemical characteristics (mean  $\pm$  sd) of the wetlands sampled in the Copper River Delta including elevation, depth, temperature, pH, specific conductivity (SpC), salinity, dissolved organic carbon (DOC), and sulfate concentrations. Freshwater physicochemical parameters, with the exception of elevation, DOC, and sulfate are from spot measurements of the hypolimnion conducted throughout summer 2014 (n = 4 per freshwater wetland). Tidal brackish wetlands parameters are from spot measurements of the surface layer (n = 5 10). DOC and sulfate are from June and August 2014 (n = 10 per wetland).

| Wetland        | Elevation<br>(m) | Depth (m)       | Temp<br>(°C)   | pH            | SpC<br>( $\mu\text{s cm}^{-1}$ ) | Salinity<br>(ppt) | DOC<br>( $\text{mg L}^{-1}$ ) | Sulfate ( $\mu\text{M}$ ) |
|----------------|------------------|-----------------|----------------|---------------|----------------------------------|-------------------|-------------------------------|---------------------------|
| Eyak N         | 5.2              | 0.60 $\pm$ 0.09 | 15.3 $\pm$ 0.9 | 5.5 $\pm$ 0.4 | 13 $\pm$ 3                       | 0.01 $\pm$ 0.01   | 6.5 $\pm$ 1.9                 | 1.6 $\pm$ 0.3             |
| Eyak S         | 5.5              | 0.61 $\pm$ 0.03 | 16.1 $\pm$ 1.3 | 7.0 $\pm$ 1.1 | 11 $\pm$ 2                       | 0.00 $\pm$ 0.01   | 5.6 $\pm$ 0.5                 | 2.0 $\pm$ 0.2             |
| Lily           | 8.2              | 0.65 $\pm$ 0.04 | 13.1 $\pm$ 0.8 | 5.9 $\pm$ 0.2 | 60 $\pm$ 19                      | 0.03 $\pm$ 0.01   | 3.5 $\pm$ 1.0                 | 6.0 $\pm$ 2.2             |
| Rich Hate Me   | 18.3             | 0.57 $\pm$ 0.15 | 11.6 $\pm$ 2.9 | 6.1 $\pm$ 0.4 | 56 $\pm$ 7                       | 0.03 $\pm$ 0.01   | 2.1 $\pm$ 0.5                 | 24 $\pm$ 5                |
| Scott S        | 13.4             | 0.81 $\pm$ 0.07 | 14.2 $\pm$ 0.9 | 6.3 $\pm$ 0.3 | 61 $\pm$ 37                      | 0.03 $\pm$ 0.02   | 2.1 $\pm$ 0.6                 | 54 $\pm$ 17               |
| Storey N       | 4.6              | 0.56 $\pm$ 0.04 | 16.8 $\pm$ 1.0 | 6.9 $\pm$ 0.4 | 74 $\pm$ 11                      | 0.04 $\pm$ 0.01   | 11 $\pm$ 0.6                  | 4.5 $\pm$ 0.7             |
| Storey S       | 2.1              | 0.60 $\pm$ 0.04 | 16.6 $\pm$ 2.4 | 7.3 $\pm$ 0.7 | 70 $\pm$ 6                       | 0.03 $\pm$ 0.00   | 4.2 $\pm$ 0.3                 | 7.9 $\pm$ 0.5             |
| Tiedeman N     | 5.5              | 0.66 $\pm$ 0.03 | 16.6 $\pm$ 1.1 | 6.0 $\pm$ 0.5 | 13 $\pm$ 3                       | 0.01 $\pm$ 0.01   | 6.7 $\pm$ 0.7                 | 1.8 $\pm$ 0.2             |
| Tiedeman S     | 5.5              | 0.73 $\pm$ 0.03 | 15.4 $\pm$ 1.4 | 6.7 $\pm$ 0.6 | 8.8 $\pm$ 1.7                    | 0.00 $\pm$ 0.00   | 5.2 $\pm$ 0.6                 | 1.7 $\pm$ 0.3             |
| Tidal brackish | 1.4              | 0.56 $\pm$ 0.24 | 14.3 $\pm$ 2.3 | 7.3 $\pm$ 0.5 | 8500 $\pm$ 9600                  | 5 $\pm$ 6         | 3.1 $\pm$ 6.3                 | 3400 $\pm$ 3900           |

**Table 2.** Sediment chemical characteristics (mean  $\pm$  sd) of the wetlands (n = 10 per wetland) sampled during June and August 2014 in the Copper River Delta including sediment organic matter (SOM %), total sediment carbon, and porewater (PW) concentrations of acetate, nitrate, and sulfate as well as total sulfate availability in the slurry incubations. All chemistry parameters were converted to the total amount of anion per gram of dry sediment ( $\text{nmol g}^{-1}$ ) for analyses, but standard porewater concentrations ( $\mu\text{M}$ ) are also reported for comparison with other studies.

5

| Wetland        | SOM (%)       | Total Sediment C ( $\text{mmol g}^{-1}$ ) | PW Acetate ( $\text{nmol g}^{-1}$ ) / ( $\mu\text{M}$ ) |                 | PW Nitrate ( $\text{nmol g}^{-1}$ ) / ( $\mu\text{M}$ ) |               | PW Sulfate ( $\text{nmol g}^{-1}$ ) / ( $\mu\text{M}$ ) |                  | Total Sulfate ( $\text{nmol g}^{-1}$ ) |
|----------------|---------------|-------------------------------------------|---------------------------------------------------------|-----------------|---------------------------------------------------------|---------------|---------------------------------------------------------|------------------|----------------------------------------|
| Eyak N         | 2.0 $\pm$ 0.5 | 0.81 $\pm$ 0.22                           | 57 $\pm$ 57                                             | 360 $\pm$ 350   | 1.2 $\pm$ 0.7                                           | 9.6 $\pm$ 9.9 | 150 $\pm$ 160                                           | 970 $\pm$ 950    | 160 $\pm$ 160                          |
| Eyak S         | 1.8 $\pm$ 0.5 | 0.71 $\pm$ 0.21                           | 18 $\pm$ 13                                             | 120 $\pm$ 82    | 1.4 $\pm$ 1.0                                           | 4.3 $\pm$ 3.1 | 65 $\pm$ 48                                             | 500 $\pm$ 350    | 67 $\pm$ 48                            |
| Lily           | 2.1 $\pm$ 0.5 | 0.86 $\pm$ 0.21                           | 58 $\pm$ 43                                             | 620 $\pm$ 560   | 0.86 $\pm$ 0.26                                         | 0.4 $\pm$ 0.2 | 5.1 $\pm$ 3.2                                           | 49 $\pm$ 27      | 11 $\pm$ 3                             |
| Rich Hate Me   | 3.1 $\pm$ 3.9 | 1.3 $\pm$ 1.6                             | 29 $\pm$ 44                                             | 110 $\pm$ 140   | 3.7 $\pm$ 4.9                                           | 2.2 $\pm$ 4.2 | 60 $\pm$ 130                                            | 96 $\pm$ 110     | 84 $\pm$ 140                           |
| Scott S        | 1.5 $\pm$ 2.2 | 0.60 $\pm$ 0.89                           | 31 $\pm$ 34                                             | 300 $\pm$ 340   | 2.2 $\pm$ 2.4                                           | 0.8 $\pm$ 0.8 | 11 $\pm$ 11                                             | 120 $\pm$ 110    | 51 $\pm$ 14                            |
| Storey N       | 1.8 $\pm$ 0.2 | 0.73 $\pm$ 0.09                           | 10 $\pm$ 5                                              | 120 $\pm$ 64    | 0.92 $\pm$ 0.39                                         | 1.2 $\pm$ 0.8 | 18 $\pm$ 11                                             | 210 $\pm$ 160    | 22 $\pm$ 12                            |
| Storey S       | 1.9 $\pm$ 3.1 | 0.76 $\pm$ 1.2                            | 15 $\pm$ 16                                             | 160 $\pm$ 120   | 0.58 $\pm$ 0.39                                         | 2.8 $\pm$ 3.1 | 39 $\pm$ 44                                             | 450 $\pm$ 460    | 46 $\pm$ 45                            |
| Tiedeman N     | 2.8 $\pm$ 2.9 | 1.1 $\pm$ 1.2                             | 25 $\pm$ 14                                             | 190 $\pm$ 95    | 1.7 $\pm$ 1.2                                           | 3.7 $\pm$ 2.8 | 56 $\pm$ 43                                             | 420 $\pm$ 320    | 93 $\pm$ 81                            |
| Tiedeman S     | 2.3 $\pm$ 0.8 | 0.93 $\pm$ 0.32                           | 17 $\pm$ 7                                              | 120 $\pm$ 45    | 2.1 $\pm$ 1.9                                           | 4.3 $\pm$ 3.4 | 66 $\pm$ 53                                             | 440 $\pm$ 320    | 67 $\pm$ 53                            |
| Tidal brackish | 6.4 $\pm$ 4.9 | 2.6 $\pm$ 2.0                             | 170 $\pm$ 190                                           | 1800 $\pm$ 1800 | 0.13 $\pm$ 0.36                                         | 88 $\pm$ 69   | 1200 $\pm$ 860                                          | 11000 $\pm$ 4900 | 3900 $\pm$ 3800                        |

**Table 3.** Generalized linear models (GLMs) wherein log-transformed CH<sub>4</sub> production rate is the response variable and ecosystem type (nontidal freshwater or tidal brackish), time period (June or August), porewater acetate level, and total sulfate availability are potential factors. Positive (↑) or negative effects (↓) of continuous factors are indicated. Models are ranked in order of the lowest Akaike information criterion corrected for low samples sizes (AIC<sub>c</sub>) along with delta AIC<sub>c</sub> (Δ<sub>i</sub>) and Akaike weights (ω<sub>i</sub>) before and after model averaging (MA). Models with a Δ<sub>i</sub> larger than 4 were not included in the model averaging. The three models with a larger AIC<sub>c</sub> than the null model (intercept only) are not presented.

| Model # | GLM                                                 | AIC <sub>c</sub> | Δ <sub>i</sub> | ω <sub>i</sub> | ω <sub>i</sub> (MA) |
|---------|-----------------------------------------------------|------------------|----------------|----------------|---------------------|
| 1       | ecosystem + time period + acetate (↑) + sulfate (↓) | 125.3            | 0.0            | 0.571          | 0.61                |
| 2       | ecosystem + acetate (↑) + sulfate (↓)               | 127.0            | 1.7            | 0.244          | 0.26                |
| 3       | ecosystem + time period + acetate (↑)               | 128.4            | 3.1            | 0.120          | 0.13                |
| 4       | ecosystem + acetate (↑)                             | 129.7            | 4.4            | 0.062          | -                   |
| 5       | ecosystem + time period + sulfate (↓)               | 137.7            | 12.4           | 0.001          | -                   |
| 6       | ecosystem + sulfate (↓)                             | 139.2            | 13.9           | 0.001          | -                   |
| 7       | time period + sulfate (↓)                           | 140.2            | 14.9           | 0              | -                   |
| 8       | sulfate (↓)                                         | 140.9            | 15.6           | 0              | -                   |
| 9       | time period + acetate (↑) + sulfate (↓)             | 141.4            | 16.2           | 0              | -                   |
| 10      | acetate (↑) + sulfate (↓)                           | 141.4            | 16.2           | 0              | -                   |
| 11      | ecosystem + time period                             | 142.9            | 17.6           | 0              | -                   |
| 12      | ecosystem                                           | 144.2            | 19.0           | 0              | -                   |
| 13      | null                                                | 158.2            | 33.9           | 0              | -                   |

**Table 4.** Generalized linear models (GLMs) wherein  $\Delta\text{CH}_4$  production rate (treatment minus control) is the response variable and the macrophyte species added (buckbean, horsetail, lily, or marestalk), porewater acetate availability, and total sulfate availability are potential factors. Positive ( $\uparrow$ ) or negative effects ( $\downarrow$ ) of continuous factors are indicated. Models are ranked in order of the lowest Akaike information criterion corrected for low samples sizes ( $\text{AIC}_c$ ) along with delta  $\text{AIC}_c$  ( $\Delta_i$ ) and Akaike weights ( $\omega_i$ ) before and after model averaging (MA). The null model (intercept only) was not included in the model averaging, and the three models with a larger  $\text{AIC}_c$  than the null model are not presented.

| Model # | GLM                                               | $\text{AIC}_c$ | $\Delta_i$ | $\omega_i$ | $\omega_i$ (MA) |
|---------|---------------------------------------------------|----------------|------------|------------|-----------------|
| 1       | acetate ( $\downarrow$ )                          | 286.4          | 0.0        | 0.429      | 0.52            |
| 2       | acetate ( $\downarrow$ ) + species                | 288.2          | 1.8        | 0.178      | 0.22            |
| 3       | acetate ( $\downarrow$ ) + sulfate ( $\uparrow$ ) | 288.9          | 2.5        | 0.121      | 0.15            |
| 4       | species                                           | 289.4          | 3.0        | 0.096      | 0.12            |
| 5       | null                                              | 290.0          | 3.6        | 0.072      | -               |

## Figure Captions

**Figure 1.** Conceptual diagram illustrating the potential effects of warming, sea-level rise, and increased organic matter (OM) availability on CH<sub>4</sub> production in coastal wetlands. These three global change mechanisms are all indirect consequences of rising CO<sub>2</sub> levels.

5 **Figure 2.** Aerial photo of the Copper River Delta taken by the USDA Forest Service depicting the major wetland ecosystem types extending from glaciers to ocean.

**Figure 3.** Mean CH<sub>4</sub> production rates (nmol g<sup>-1</sup> of dry sediment day<sup>-1</sup>) from Copper River Delta non-tidal freshwater (n = 9) and tidal brackish (n = 5) wetlands during A) June and B) August, 2014. Error bars represent standard errors.

10 **Figure 4.** Mean CH<sub>4</sub> production rates (nmol g<sup>-1</sup> of dry sediment day<sup>-1</sup>) from non-tidal freshwater wetland sediments incubated with freshwater (FW/FW; n = 5) and other sediments from the same freshwater wetlands incubated with brackish water from tidal brackish wetlands (FW/BR; n = 5). Error bars represent standard errors. This sea-level rise simulation was conducted over a 14-day period in June 2014.

15 **Figure 5.** Mean CH<sub>4</sub> production rates (nmol g<sup>-1</sup> of dry sediment day<sup>-1</sup>) from organic matter treatments (CTL = control, BB = buckbean *Menyanthes trifoliata*, HT = horsetail *Equisetum variegatum*, LI = lily *Nuphar polysepalum*, and MT = maretail *Hippuris vulgaris*) replicated in five non-tidal freshwater wetlands during August 2014. Error bars represent standard error.

20 **Figure 6.** Actual response of ΔCH<sub>4</sub> production (treatment–control; nmol g<sup>-1</sup> of dry sediment day<sup>-1</sup>) plotted against the predicted response from model-averaged parameter estimates of the macrophyte species added (BB= buckbean *Menyanthes trifoliata*, HT = horsetail *Equisetum variegatum*, LI = lily *Nuphar polysepalum*, and MT = maretail *Hippuris vulgaris*), porewater acetate availability, and total sulfate availability. The dashed black line depicts the 1:1 line, and above the gray dotted line marks the point at which adding organic matter increased CH<sub>4</sub> production (or ΔCH<sub>4</sub> production > 0). The solid black line is the best-fit line between the actual and the predicted responses ( $y = 0.95x - 86$ ;  $r^2$  of 0.59), which demonstrates that although the model did a decent job of predicting relative changes in the response, it tended to underestimate ΔCH<sub>4</sub> production.



5

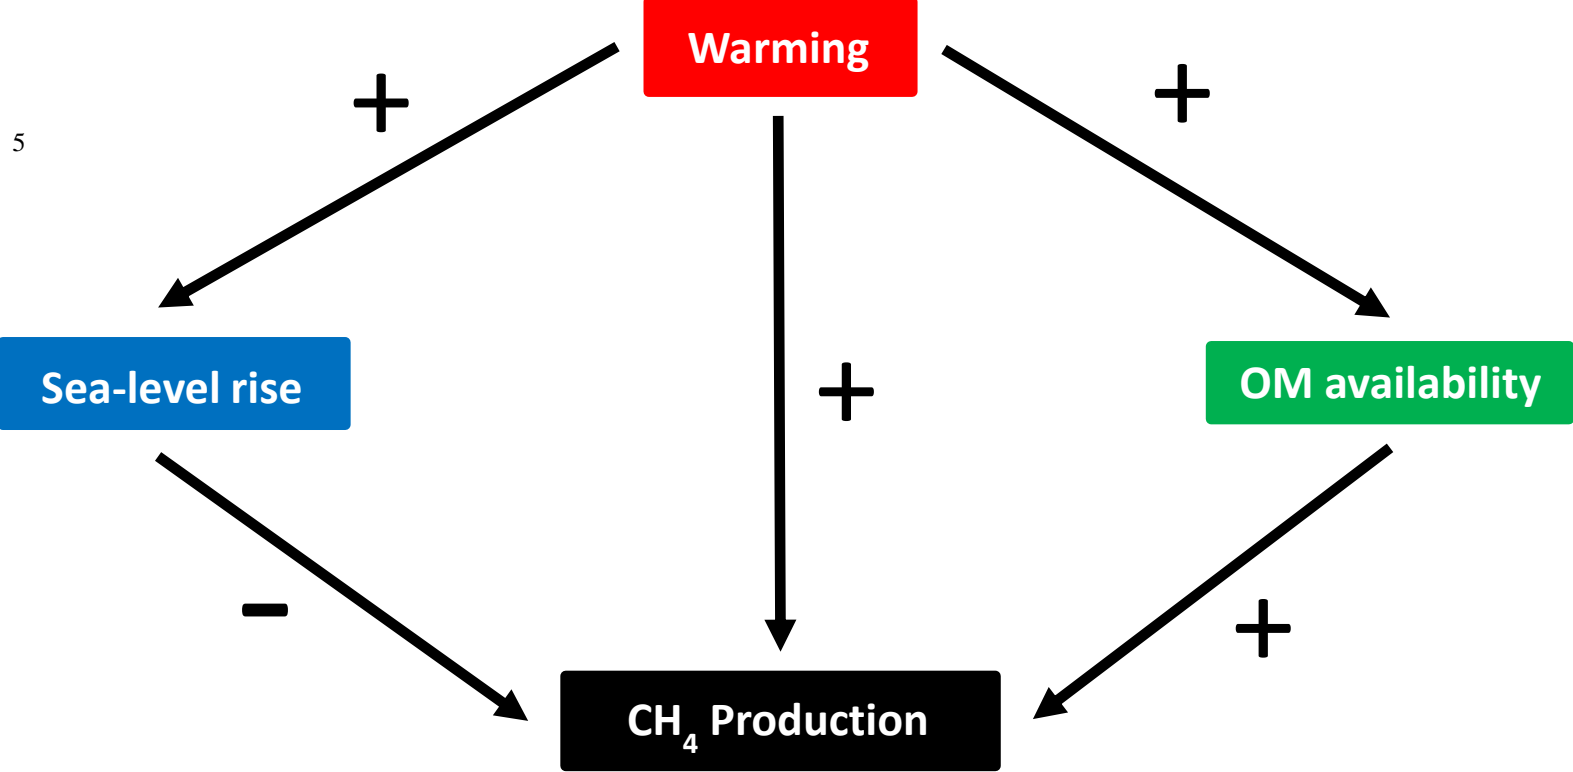

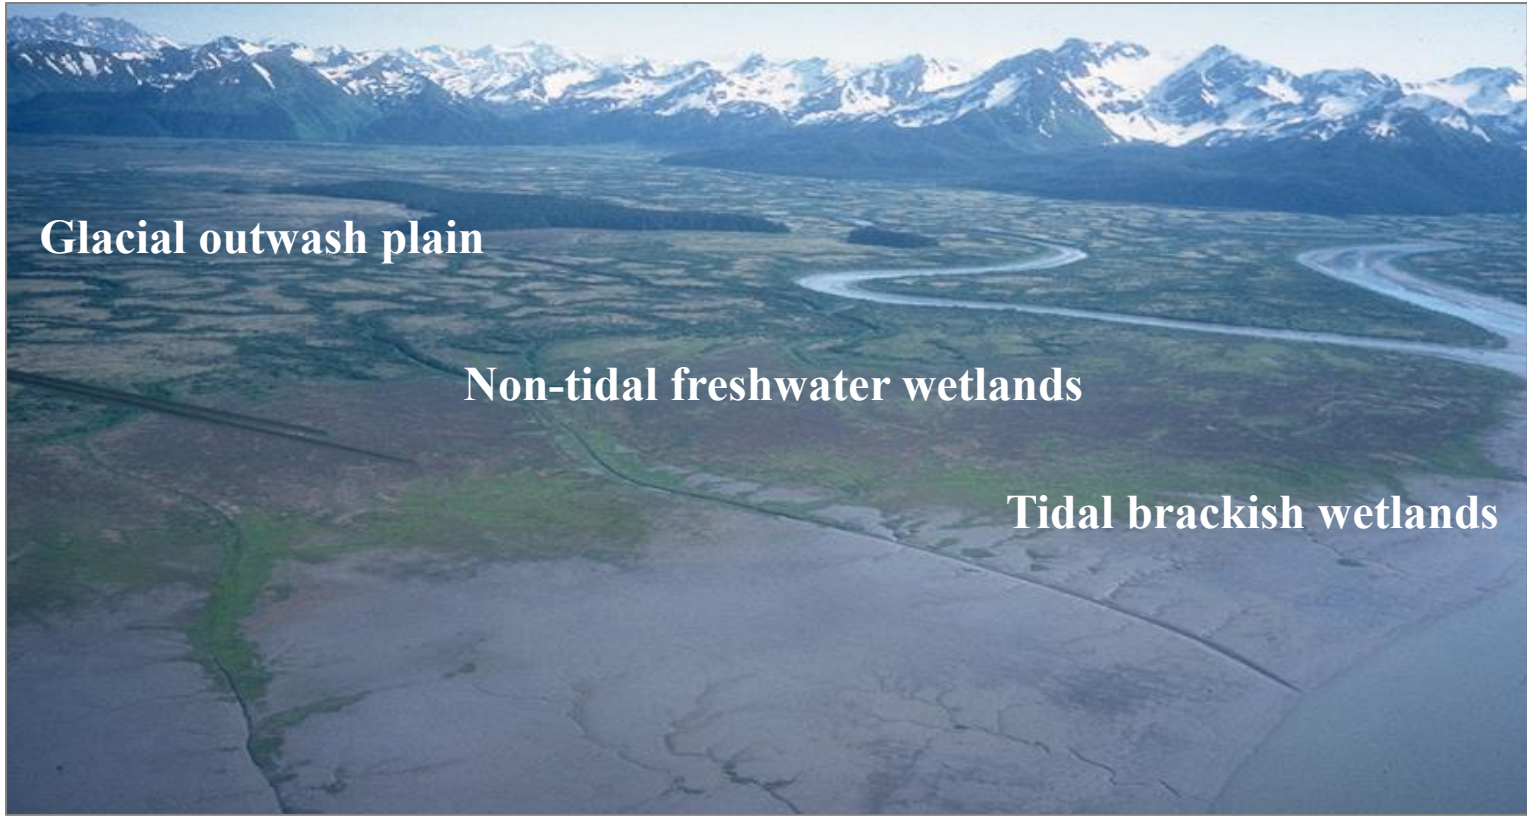

**Glacial outwash plain**

**Non-tidal freshwater wetlands**

**Tidal brackish wetlands**

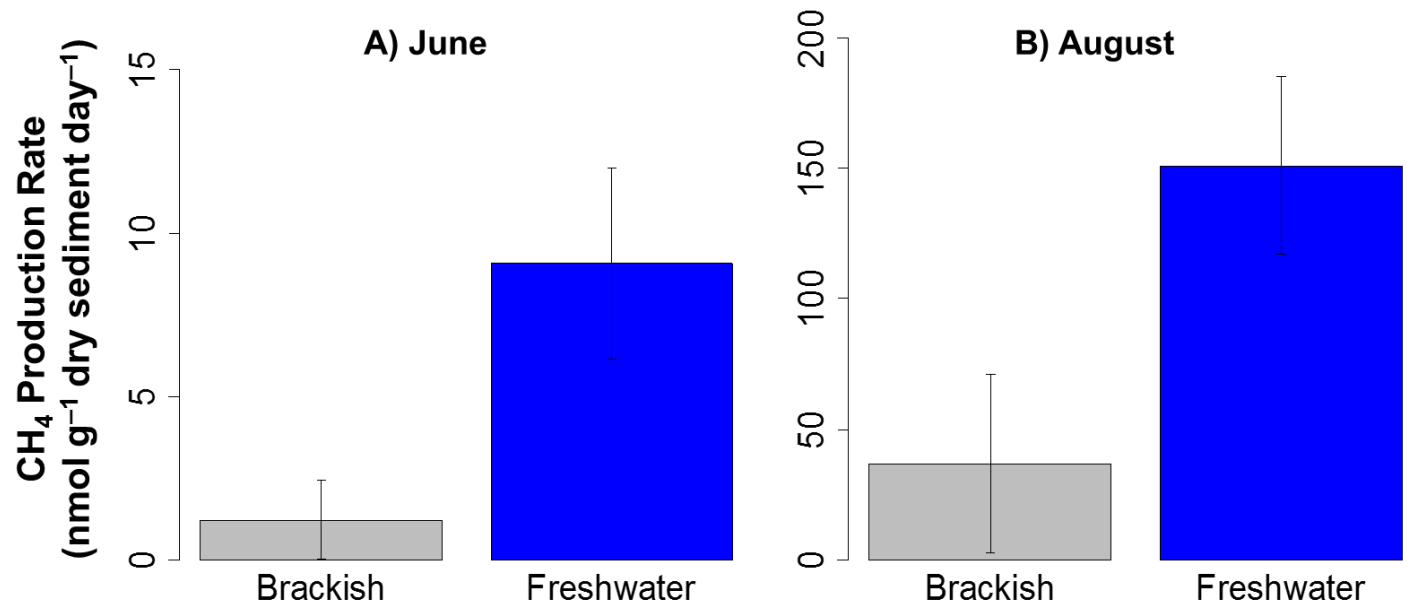

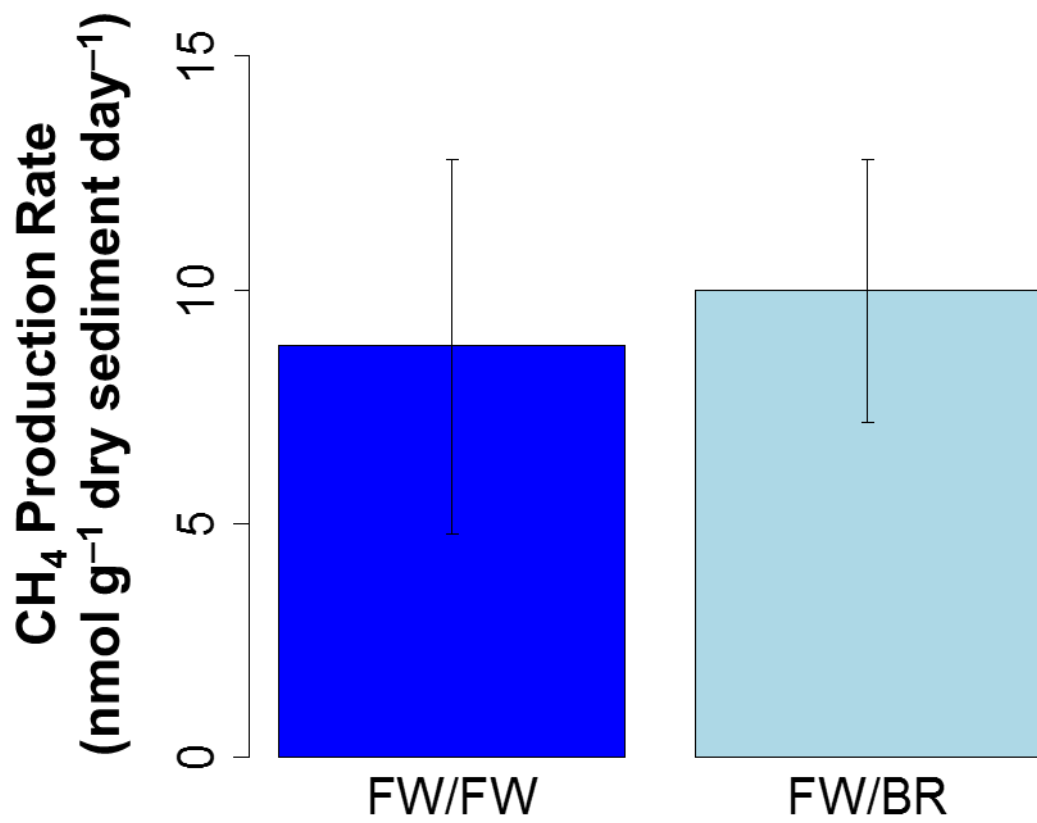

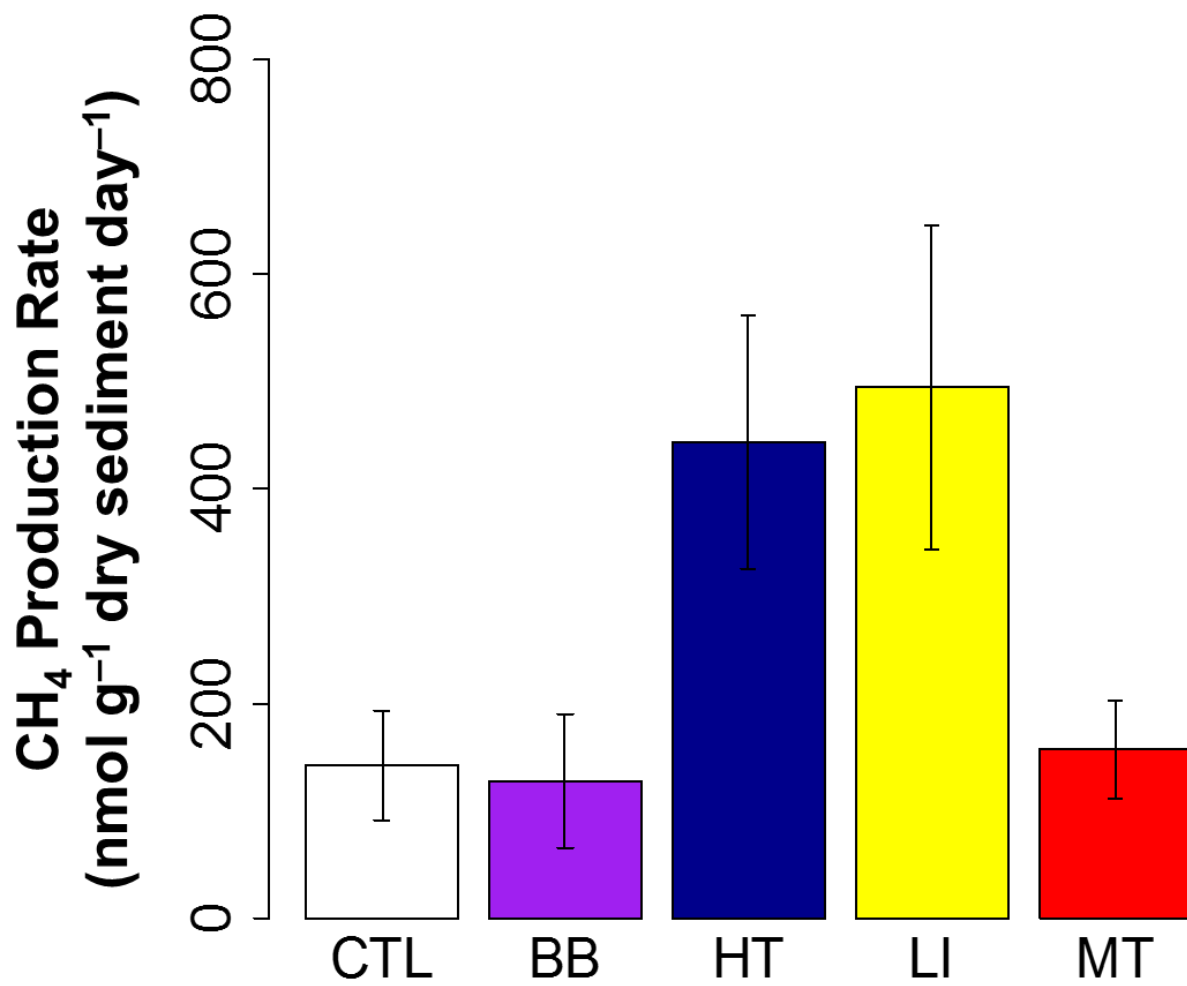

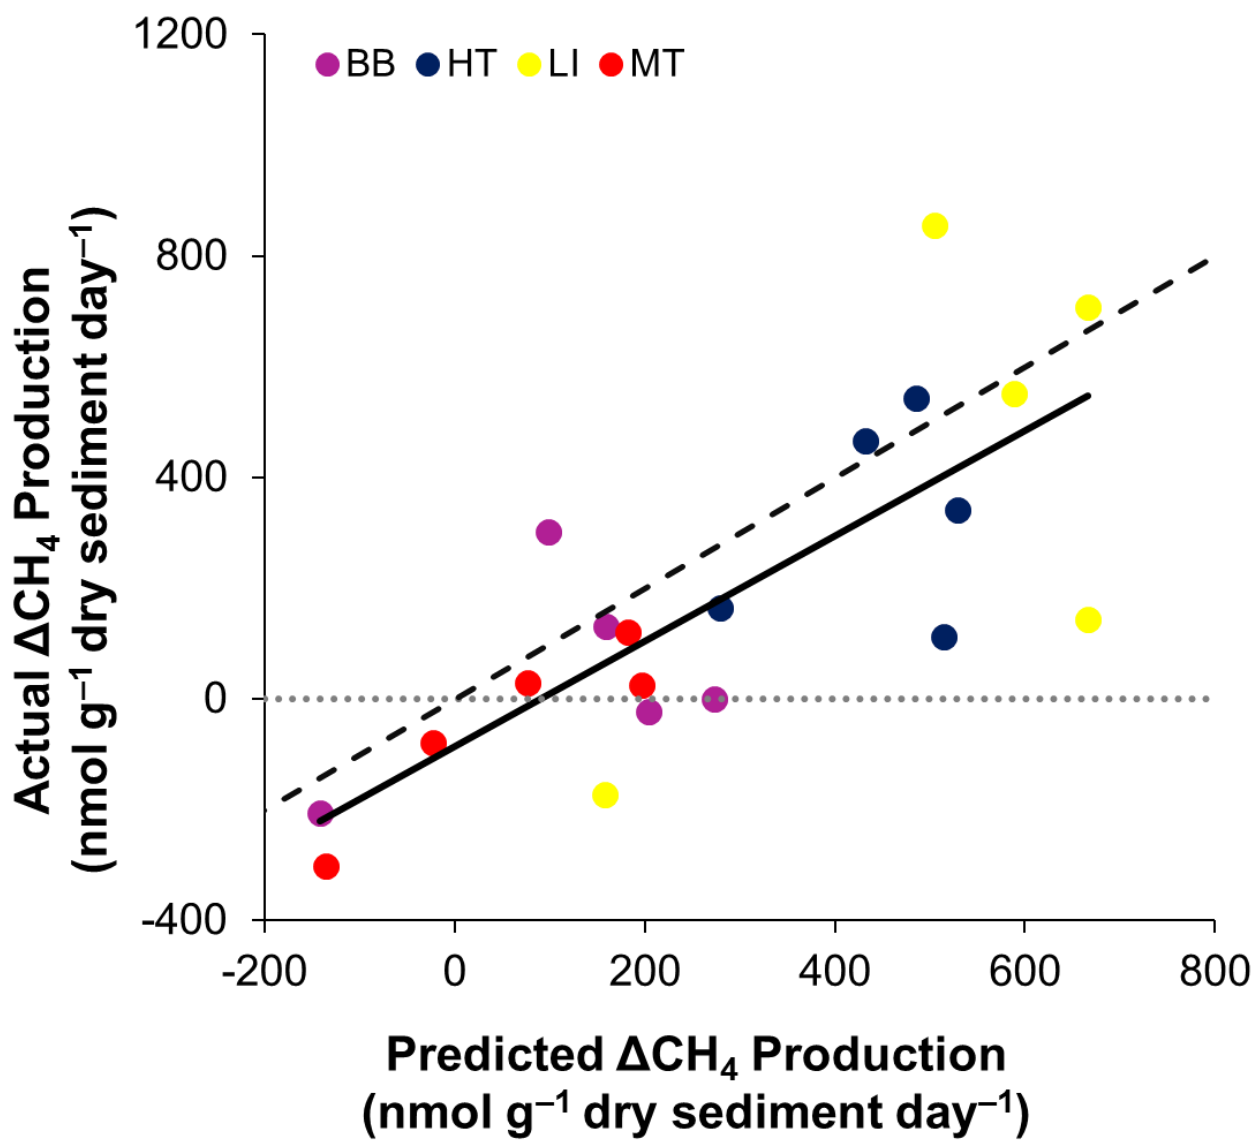

Supplement: Supplementary file [file bg-2016-314-AC5-supplement.pdf]
